# Supplementary material for: Cortico-hippocampal network connections support the multidimensional quality of episodic memory
Source: eLife. 2019 Mar 22;8:e45591. doi: 10.7554/eLife.45591 (PMC6450667; doi:10.7554/eLife.45591)
Supplement: Figure 2—source data 1. [file elife-45591-fig2-data1.xlsx]

## Sheet: AllData_fMRI-behavior
SubID	StudyTrial	TestTrial	Run	ColorStudy	SceneStudy	ColorResponse	SceneResponse	ColorError	SceneError
1	19	1	1	36	276	63	312	27	36
1	12	2	1	297	111	300	354	3	-117
1	11	3	1	348	171	267	258	-81	87
1	21	4	1	174	93	183	183	9	90
1	14	5	1	195	93	48	288	-147	-165
1	15	6	1	288	252	60	168	132	-84
1	16	7	1	189	312	261	222	72	-90
1	8	8	1	255	135	243	108	-12	-27
1	3	9	1	213	243	234	267	21	24
1	9	10	1	216	63	291	42	75	-21
1	4	11	1	348	180	273	36	-75	-144
1	5	12	1	60	267	69	69	9	162
1	20	13	1	45	24	63	9	18	-15
1	1	14	1	330	195	63	174	93	-21
1	6	15	1	351	201	258	177	-93	-24
1	10	16	1	150	120	246	330	96	-150
1	24	17	1	150	123	234	279	84	156
1	2	18	1	63	342	69	348	6	6
1	23	19	1	102	174	54	129	-48	-45
1	22	20	1	345	183	45	315	60	132
1	17	21	1	147	72	219	102	72	30
1	7	22	1	273	333	255	312	-18	-21
1	13	23	1	135	21	132	33	-3	12
1	18	24	1	243	9	273	138	30	129
1	27	25	2	90	162	66	312	-24	150
1	32	26	2	78	45	48	27	-30	-18
1	38	27	2	12	267	6	255	-6	-12
1	26	28	2	309	240	312	228	3	-12
1	45	29	2	189	237	342	234	153	-3
1	48	30	2	264	48	69	42	165	-6
1	33	31	2	261	327	216	84	-45	117
1	43	32	2	156	216	240	306	84	90
1	41	33	2	306	324	309	63	3	99
1	44	34	2	75	150	54	45	-21	-105
1	47	35	2	147	102	102	108	-45	6
1	34	36	2	213	132	231	279	18	147
1	37	37	2	237	345	249	336	12	-9
1	42	38	2	21	189	150	171	129	-18
1	46	39	2	186	279	117	66	-69	147
1	40	40	2	303	333	267	354	-36	21
1	30	41	2	240	48	36	186	156	138
1	39	42	2	162	168	261	186	99	18
1	28	43	2	297	300	126	6	-171	66
1	31	44	2	123	285	321	201	-162	-84
1	35	45	2	9	21	276	318	-93	-63
1	29	46	2	57	108	123	27	66	-81
1	25	47	2	123	129	81	174	-42	45
1	36	48	2	3	234	261	63	-102	-171
1	59	49	3	168	294	270	276	102	-18
1	49	50	3	42	120	84	111	42	-9
1	68	51	3	246	315	162	273	-84	-42
1	53	52	3	219	33	270	24	51	-9
1	56	53	3	78	3	90	21	12	18
1	72	54	3	186	174	120	15	-66	-159
1	52	55	3	201	315	54	339	-147	24
1	67	56	3	48	87	75	57	27	-30
1	63	57	3	171	246	129	261	-42	15
1	55	58	3	15	60	234	96	-141	36
1	69	59	3	273	225	264	171	-9	-54
1	71	60	3	42	66	252	18	-150	-48
1	64	61	3	180	315	261	318	81	3
1	61	62	3	60	180	30	207	-30	27
1	62	63	3	93	297	228	309	135	12
1	57	64	3	234	231	246	204	12	-27
1	58	65	3	300	48	255	48	-45	0
1	54	66	3	267	12	222	252	-45	-120
1	70	67	3	12	237	276	225	-96	-12
1	60	68	3	138	318	267	12	129	54
1	66	69	3	42	84	258	231	-144	147
1	65	70	3	117	102	261	51	144	-51
1	50	71	3	273	177	339	189	66	12
1	51	72	3	105	360	96	354	-9	-6
1	73	73	4	120	45	129	54	9	9
1	88	74	4	300	147	294	135	-6	-12
1	96	75	4	216	324	138	309	-78	-15
1	87	76	4	111	81	288	99	177	18
1	92	77	4	276	198	249	213	-27	15
1	91	78	4	330	255	24	249	54	-6
1	81	79	4	144	15	267	246	123	-129
1	85	80	4	282	258	279	39	-3	141
1	90	81	4	198	360	129	360	-69	0
1	82	82	4	309	318	189	129	-120	171
1	80	83	4	51	156	150	192	99	36
1	86	84	4	360	300	57	309	57	9
1	79	85	4	129	246	294	219	165	-27
1	95	86	4	210	360	225	345	15	-15
1	78	87	4	3	45	30	201	27	156
1	83	88	4	225	150	198	153	-27	3
1	76	89	4	138	240	255	36	117	156
1	93	90	4	126	309	129	141	3	-168
1	75	91	4	180	27	297	87	117	60
1	84	92	4	3	174	27	126	24	-48
1	74	93	4	285	90	282	30	-3	-60
1	77	94	4	54	99	60	108	6	9
1	94	95	4	240	120	216	117	-24	-3
1	89	96	4	33	60	30	63	-3	3
1	106	97	5	249	57	213	75	-36	18
1	103	98	5	336	249	270	243	-66	-6
1	102	99	5	111	120	168	138	57	18
1	118	100	5	159	18	282	27	123	9
1	99	101	5	174	264	180	246	6	-18
1	110	102	5	306	342	135	348	-171	6
1	113	103	5	327	318	228	258	-99	-60
1	111	104	5	57	39	78	15	21	-24
1	115	105	5	54	315	72	234	18	-81
1	108	106	5	204	180	228	159	24	-21
1	109	107	5	117	123	105	150	-12	27
1	117	108	5	150	246	264	174	114	-72
1	114	109	5	129	45	297	51	168	6
1	98	110	5	177	108	183	129	6	21
1	100	111	5	15	96	357	102	-18	6
1	120	112	5	294	198	108	195	174	-3
1	97	113	5	45	174	141	192	96	18
1	105	114	5	165	318	246	294	81	-24
1	112	115	5	60	297	132	291	72	-6
1	104	116	5	99	165	360	99	-99	-66
1	119	117	5	159	63	240	3	81	-60
1	101	118	5	228	117	225	108	-3	-9
1	116	119	5	339	315	108	21	129	66
1	107	120	5	90	54	72	195	-18	141
1	129	121	6	108	27	138	12	30	-15
1	139	122	6	159	204	168	180	9	-24
1	134	123	6	279	135	132	291	-147	156
1	140	124	6	225	84	231	111	6	27
1	122	125	6	183	201	105	201	-78	0
1	121	126	6	351	300	15	300	24	0
1	132	127	6	186	216	237	264	51	48
1	131	128	6	84	150	234	153	150	3
1	136	129	6	246	78	189	159	-57	81
1	125	130	6	27	168	18	141	-9	-27
1	126	131	6	219	270	72	120	-147	-150
1	133	132	6	42	27	294	195	-108	168
1	137	133	6	252	30	78	144	-174	114
1	144	134	6	348	330	6	339	18	9
1	124	135	6	63	21	78	12	15	-9
1	142	136	6	279	132	273	141	-6	9
1	130	137	6	132	282	3	264	-129	-18
1	127	138	6	273	315	117	141	-156	-174
1	141	139	6	216	153	132	180	-84	27
1	123	140	6	138	30	150	24	12	-6
1	135	141	6	321	324	270	327	-51	3
1	143	142	6	33	87	216	105	-177	18
1	128	143	6	51	168	102	165	51	-3
1	138	144	6	141	81	84	111	-57	30
2	23	1	1	234	339	348	99	114	120
2	14	2	1	30	177	120	312	90	135
2	18	3	1	21	108	246	300	-135	-168
2	20	4	1	213	96	243	75	30	-21
2	10	5	1	138	261	165	99	27	-162
2	4	6	1	312	312	12	306	60	-6
2	11	7	1	210	282	12	288	162	6
2	22	8	1	333	57	18	33	45	-24
2	9	9	1	90	345	213	288	123	-57
2	7	10	1	342	78	21	78	39	0
2	13	11	1	342	111	3	183	21	72
2	17	12	1	150	261	162	267	12	6
2	1	13	1	279	162	201	180	-78	18
2	12	14	1	282	183	252	291	-30	108
2	24	15	1	75	165	258	279	-177	114
2	8	16	1	66	345	6	177	-60	-168
2	5	17	1	174	99	219	99	45	0
2	3	18	1	243	60	195	72	-48	12
2	6	19	1	108	210	24	207	-84	-3
2	15	20	1	279	291	243	105	-36	174
2	2	21	1	3	42	267	351	-96	-51
2	21	22	1	147	39	162	75	15	36
2	19	23	1	300	249	225	192	-75	-57
2	16	24	1	276	342	150	267	-126	-75
2	37	25	2	108	237	27	30	-81	153
2	28	26	2	21	105	21	285	0	-180
2	30	27	2	312	162	159	168	-153	6
2	27	28	2	336	105	9	105	33	0
2	26	29	2	303	339	141	294	-162	-45
2	36	30	2	183	216	252	303	69	87
2	41	31	2	144	273	27	162	-117	-111
2	38	32	2	69	30	90	45	21	15
2	35	33	2	327	39	357	33	30	-6
2	29	34	2	330	345	27	6	57	21
2	43	35	2	171	246	156	189	-15	-57
2	45	36	2	75	324	357	84	-78	120
2	46	37	2	15	165	345	255	-30	90
2	39	38	2	42	303	252	315	-150	12
2	33	39	2	117	159	270	144	153	-15
2	48	40	2	267	354	228	93	-39	99
2	40	41	2	93	216	153	195	60	-21
2	44	42	2	204	36	342	348	138	-48
2	42	43	2	168	117	111	27	-57	-90
2	31	44	2	12	225	105	267	93	42
2	47	45	2	192	84	39	33	-153	-51
2	34	46	2	24	318	186	201	162	-117
2	25	47	2	123	189	354	195	-129	6
2	32	48	2	276	357	174	108	-102	111
2	58	49	3	75	51	75	66	0	15
2	51	50	3	219	108	147	174	-72	66
2	50	51	3	306	117	159	285	-147	168
2	67	52	3	183	24	240	3	57	-21
2	55	53	3	351	60	18	45	27	-15
2	63	54	3	174	102	225	87	51	-15
2	72	55	3	135	285	174	288	39	3
2	70	56	3	231	339	276	150	45	171
2	68	57	3	72	222	90	36	18	174
2	52	58	3	150	189	153	144	3	-45
2	54	59	3	327	57	258	66	-69	9
2	62	60	3	21	270	354	273	-27	3
2	65	61	3	300	195	243	174	-57	-21
2	49	62	3	228	159	174	219	-54	60
2	71	63	3	306	315	306	276	0	-39
2	53	64	3	66	240	102	186	36	-54
2	66	65	3	357	96	6	150	9	54
2	57	66	3	336	174	234	303	-102	129
2	61	67	3	195	180	255	174	60	-6
2	59	68	3	96	27	144	36	48	9
2	64	69	3	237	309	162	324	-75	15
2	69	70	3	213	3	276	3	63	0
2	60	71	3	54	258	120	204	66	-54
2	56	72	3	153	147	135	153	-18	6
2	96	73	4	300	81	285	24	-15	-57
2	83	74	4	6	342	249	348	-117	6
2	89	75	4	159	105	15	294	-144	-171
2	82	76	4	72	303	15	303	-57	0
2	73	77	4	132	45	156	57	24	12
2	88	78	4	87	174	210	3	123	-171
2	95	79	4	96	321	129	345	33	24
2	93	80	4	258	333	9	309	111	-24
2	86	81	4	195	132	261	171	66	39
2	74	82	4	150	114	111	102	-39	-12
2	76	83	4	255	51	267	60	12	9
2	87	84	4	318	327	144	303	-174	-24
2	94	85	4	165	120	261	138	96	18
2	92	86	4	192	255	117	273	-75	18
2	81	87	4	261	216	150	87	-111	-129
2	77	88	4	342	159	351	195	9	36
2	79	89	4	108	168	123	207	15	39
2	75	90	4	69	270	69	36	0	126
2	91	91	4	273	66	237	90	-36	24
2	84	92	4	198	222	108	105	-90	-117
2	90	93	4	204	315	192	291	-12	-24
2	85	94	4	324	186	72	177	108	-9
2	78	95	4	333	258	351	39	18	141
2	80	96	4	279	24	141	321	-138	-63
2	106	97	5	27	39	15	30	-12	-9
2	111	98	5	273	93	258	84	-15	-9
2	104	99	5	285	72	243	90	-42	18
2	113	100	5	237	3	228	351	-9	-12
2	120	101	5	267	351	258	300	-9	-51
2	115	102	5	171	222	117	237	-54	15
2	108	103	5	72	339	75	330	3	-9
2	109	104	5	243	351	129	21	-114	30
2	118	105	5	129	120	84	177	-45	57
2	107	106	5	3	147	357	99	-6	-48
2	119	107	5	360	159	354	168	-6	9
2	100	108	5	108	285	150	165	42	-120
2	98	109	5	201	204	276	177	75	-27
2	105	110	5	144	126	129	189	-15	63
2	110	111	5	231	333	147	159	-84	-174
2	99	112	5	198	33	240	15	42	-18
2	102	113	5	48	165	120	183	72	18
2	117	114	5	300	258	72	225	132	-33
2	101	115	5	48	282	165	300	117	18
2	114	116	5	177	150	243	168	66	18
2	112	117	5	117	18	69	327	-48	-51
2	97	118	5	315	258	276	315	-39	57
2	116	119	5	204	84	105	42	-99	-42
2	103	120	5	123	294	111	162	-12	-132
2	143	121	6	12	150	3	129	-9	-21
2	128	122	6	354	264	357	231	3	-33
2	135	123	6	105	186	276	30	171	-156
2	122	124	6	234	336	243	3	9	27
2	131	125	6	45	36	9	213	-36	177
2	126	126	6	138	297	96	327	-42	30
2	139	127	6	9	165	96	51	87	-114
2	123	128	6	270	6	222	27	-48	21
2	141	129	6	42	345	354	360	-48	15
2	121	130	6	297	237	294	240	-3	3
2	134	131	6	111	222	84	165	-27	-57
2	132	132	6	204	258	204	276	0	18
2	124	133	6	327	93	360	93	33	0
2	137	134	6	216	162	108	111	-108	-51
2	125	135	6	192	357	225	69	33	72
2	136	136	6	159	81	150	66	-9	-15
2	144	137	6	360	273	132	195	132	-78
2	129	138	6	243	102	264	111	21	9
2	142	139	6	78	213	9	189	-69	-24
2	140	140	6	237	303	255	300	18	-3
2	127	141	6	87	99	78	108	-9	9
2	138	142	6	288	171	240	162	-48	-9
2	130	143	6	102	45	99	66	-3	21
2	133	144	6	189	168	99	78	-90	-90
3	1	1	1	123	291	78	201	-45	-90
3	17	2	1	99	48	81	42	-18	-6
3	11	3	1	21	108	51	117	30	9
3	7	4	1	237	162	279	165	42	3
3	9	5	1	171	138	138	342	-33	-156
3	22	6	1	111	159	123	141	12	-18
3	2	7	1	234	141	243	162	9	21
3	19	8	1	60	240	99	222	39	-18
3	5	9	1	201	315	282	303	81	-12
3	8	10	1	135	300	150	273	15	-27
3	16	11	1	177	66	147	114	-30	48
3	13	12	1	264	126	258	120	-6	-6
3	3	13	1	327	273	39	255	72	-18
3	6	14	1	330	51	123	342	153	-69
3	24	15	1	324	342	357	303	33	-39
3	21	16	1	249	354	261	339	12	-15
3	20	17	1	24	198	21	195	-3	-3
3	10	18	1	39	249	24	261	-15	12
3	23	19	1	87	81	198	84	111	3
3	14	20	1	339	225	6	165	27	-60
3	4	21	1	153	231	108	237	-45	6
3	12	22	1	75	324	111	333	36	9
3	18	23	1	213	285	36	60	-177	135
3	15	24	1	87	69	6	261	-81	-168
3	43	25	2	54	339	87	333	33	-6
3	37	26	2	216	243	279	237	63	-6
3	47	27	2	93	9	144	6	51	-3
3	38	28	2	324	45	345	60	21	15
3	25	29	2	303	291	33	108	90	177
3	39	30	2	123	132	60	135	-63	3
3	42	31	2	60	75	42	99	-18	24
3	46	32	2	273	69	270	75	-3	6
3	33	33	2	264	225	255	225	-9	0
3	26	34	2	351	186	336	189	-15	3
3	36	35	2	84	171	84	171	0	0
3	35	36	2	120	60	156	42	36	-18
3	45	37	2	60	357	66	357	6	0
3	28	38	2	9	129	54	135	45	6
3	27	39	2	168	309	135	276	-33	-33
3	32	40	2	255	108	279	165	24	57
3	41	41	2	153	96	69	84	-84	-12
3	48	42	2	318	303	30	315	72	12
3	34	43	2	99	198	123	186	24	-12
3	40	44	2	327	195	27	159	60	-36
3	29	45	2	354	318	108	300	114	-18
3	44	46	2	189	318	285	324	96	6
3	30	47	2	33	354	36	345	3	-9
3	31	48	2	228	288	243	285	15	-3
3	57	49	3	246	354	273	357	27	3
3	50	50	3	183	129	195	132	12	3
3	54	51	3	84	237	90	222	6	-15
3	71	52	3	18	72	42	72	24	0
3	67	53	3	216	177	273	174	57	-3
3	64	54	3	18	183	33	186	15	3
3	49	55	3	72	192	108	192	36	0
3	53	56	3	195	99	189	108	-6	9
3	55	57	3	84	174	87	171	3	-3
3	66	58	3	96	240	120	234	24	-6
3	70	59	3	282	90	279	90	-3	0
3	56	60	3	126	18	162	18	36	0
3	63	61	3	180	78	180	51	0	-27
3	51	62	3	306	282	15	297	69	15
3	65	63	3	300	9	276	12	-24	3
3	60	64	3	255	261	204	243	-51	-18
3	59	65	3	348	270	345	291	-3	21
3	62	66	3	300	162	333	198	33	36
3	68	67	3	66	219	78	231	12	12
3	61	68	3	183	69	207	63	24	-6
3	72	69	3	96	168	87	147	-9	-21
3	58	70	3	21	318	21	297	0	-21
3	69	71	3	318	24	327	12	9	-12
3	52	72	3	12	42	24	90	12	48
3	94	73	4	177	162	198	177	21	15
3	96	74	4	213	294	213	291	0	-3
3	87	75	4	198	60	204	60	6	0
3	74	76	4	72	66	57	54	-15	-12
3	77	77	4	9	222	354	231	-15	9
3	86	78	4	285	354	237	354	-48	0
3	76	79	4	249	201	144	198	-105	-3
3	81	80	4	27	321	6	327	-21	6
3	79	81	4	189	249	201	246	12	-3
3	91	82	4	24	60	36	51	12	-9
3	85	83	4	21	159	24	177	3	18
3	93	84	4	357	33	42	36	45	3
3	83	85	4	360	6	36	6	36	0
3	89	86	4	246	3	261	354	15	-9
3	90	87	4	291	102	267	96	-24	-6
3	88	88	4	327	324	297	321	-30	-3
3	95	89	4	159	180	153	201	-6	21
3	78	90	4	105	111	165	96	60	-15
3	75	91	4	75	234	216	135	141	-99
3	84	92	4	279	117	267	126	-12	9
3	92	93	4	195	111	246	162	51	51
3	80	94	4	192	306	195	306	3	0
3	73	95	4	108	342	114	318	6	-24
3	82	96	4	267	15	291	12	24	-3
3	101	97	5	180	315	207	315	27	0
3	117	98	5	258	105	249	105	-9	0
3	109	99	5	285	153	237	132	-48	-21
3	99	100	5	237	144	237	147	0	3
3	97	101	5	321	90	324	81	3	-9
3	108	102	5	204	141	279	141	75	0
3	116	103	5	312	171	294	186	-18	15
3	112	104	5	324	54	18	60	54	6
3	105	105	5	48	81	30	87	-18	6
3	104	106	5	87	24	114	6	27	-18
3	120	107	5	78	9	75	3	-3	-6
3	111	108	5	9	24	30	3	21	-21
3	114	109	5	132	72	162	69	30	-3
3	100	110	5	231	207	267	201	36	-6
3	115	111	5	357	153	9	156	12	3
3	110	112	5	177	339	96	342	-81	3
3	119	113	5	261	273	24	267	123	-6
3	118	114	5	360	285	342	288	-18	3
3	113	115	5	99	201	135	201	36	0
3	107	116	5	81	270	90	276	9	6
3	106	117	5	201	18	279	15	78	-3
3	98	118	5	243	213	48	192	165	-21
3	103	119	5	294	282	318	306	24	24
3	102	120	5	171	324	198	315	27	-9
3	137	121	6	354	222	330	219	-24	-3
3	133	122	6	354	318	12	315	18	-3
3	128	123	6	261	306	270	312	9	6
3	126	124	6	327	162	342	171	15	9
3	129	125	6	15	24	24	39	9	15
3	135	126	6	279	246	258	255	-21	9
3	140	127	6	90	75	96	69	6	-6
3	123	128	6	204	141	213	150	9	9
3	136	129	6	132	84	141	69	9	-15
3	130	130	6	255	351	282	351	27	0
3	144	131	6	165	246	129	240	-36	-6
3	125	132	6	90	114	162	105	72	-9
3	134	133	6	45	207	57	174	12	-33
3	124	134	6	228	219	261	210	33	-9
3	131	135	6	267	9	228	6	-39	-3
3	143	136	6	87	108	78	183	-9	75
3	139	137	6	231	201	276	219	45	18
3	142	138	6	45	354	339	348	-66	-6
3	127	139	6	306	195	303	192	-3	-3
3	122	140	6	57	60	54	51	-3	-9
3	132	141	6	219	126	246	108	27	-18
3	138	142	6	141	75	147	69	6	-6
3	141	143	6	24	306	6	309	-18	3
3	121	144	6	357	231	21	216	24	-15
4	10	1	1	84	111	207	114	123	3
4	2	2	1	78	312	66	348	-12	36
4	11	3	1	51	222	234	282	-177	60
4	23	4	1	330	120	18	291	48	171
4	8	5	1	285	39	276	153	-9	114
4	1	6	1	333	99	279	201	-54	102
4	17	7	1	213	333	285	339	72	6
4	6	8	1	255	66	240	72	-15	6
4	7	9	1	231	321	273	300	42	-21
4	4	10	1	72	141	78	138	6	-3
4	18	11	1	336	12	27	351	51	-21
4	14	12	1	201	330	72	333	-129	3
4	13	13	1	216	69	213	45	-3	-24
4	20	14	1	180	177	237	168	57	-9
4	3	15	1	102	285	183	246	81	-39
4	21	16	1	339	354	144	276	165	-78
4	5	17	1	21	51	36	21	15	-30
4	9	18	1	276	213	228	54	-48	-159
4	19	19	1	141	168	141	96	0	-72
4	15	20	1	264	147	240	255	-24	108
4	12	21	1	276	30	258	102	-18	72
4	24	22	1	126	306	126	309	0	3
4	16	23	1	336	303	30	30	54	87
4	22	24	1	243	87	228	201	-15	114
4	40	25	2	102	180	156	192	54	12
4	42	26	2	327	111	324	114	-3	3
4	36	27	2	312	105	297	99	-15	-6
4	45	28	2	336	132	339	147	3	15
4	26	29	2	189	303	108	321	-81	18
4	44	30	2	246	297	279	303	33	6
4	29	31	2	33	252	339	252	-54	0
4	35	32	2	144	198	108	180	-36	-18
4	47	33	2	24	84	18	81	-6	-3
4	32	34	2	171	342	138	351	-33	9
4	34	35	2	285	195	261	216	-24	21
4	46	36	2	135	117	126	108	-9	-9
4	33	37	2	3	327	12	324	9	-3
4	37	38	2	243	288	246	285	3	-3
4	38	39	2	201	15	129	15	-72	0
4	30	40	2	243	279	267	288	24	9
4	28	41	2	303	18	342	336	39	-42
4	27	42	2	99	36	108	54	9	18
4	25	43	2	252	87	264	66	12	-21
4	43	44	2	198	243	225	243	27	0
4	31	45	2	105	171	135	198	30	27
4	48	46	2	315	201	294	276	-21	75
4	41	47	2	57	6	339	9	-78	3
4	39	48	2	108	150	135	153	27	3
4	72	49	3	267	144	231	144	-36	0
4	57	50	3	81	57	150	51	69	-6
4	56	51	3	321	84	135	90	174	6
4	66	52	3	279	114	240	114	-39	0
4	50	53	3	153	54	147	102	-6	48
4	71	54	3	246	312	162	333	-84	21
4	68	55	3	249	144	273	123	24	-21
4	58	56	3	357	270	36	249	39	-21
4	59	57	3	9	117	357	108	-12	-9
4	55	58	3	141	243	135	204	-6	-39
4	64	59	3	255	342	231	348	-24	6
4	62	60	3	90	9	135	15	45	6
4	69	61	3	210	12	225	351	15	-21
4	49	62	3	117	6	108	9	-9	3
4	51	63	3	285	201	285	228	0	27
4	61	64	3	78	183	93	156	15	-27
4	70	65	3	102	141	150	153	48	12
4	52	66	3	168	327	177	318	9	-9
4	65	67	3	54	87	63	87	9	0
4	53	68	3	216	36	240	51	24	15
4	63	69	3	177	81	183	84	6	3
4	54	70	3	30	189	45	159	15	-30
4	60	71	3	312	294	312	282	0	-12
4	67	72	3	45	186	360	195	-45	9
4	90	73	4	150	159	138	162	-12	3
4	91	74	4	60	48	48	42	-12	-6
4	86	75	4	246	183	228	189	-18	6
4	89	76	4	153	294	138	300	-15	6
4	77	77	4	282	126	315	99	33	-27
4	82	78	4	57	15	342	36	-75	21
4	73	79	4	198	267	237	273	39	6
4	96	80	4	105	345	123	345	18	0
4	78	81	4	321	240	312	135	-9	-105
4	79	82	4	261	129	249	126	-12	-3
4	88	83	4	201	12	222	24	21	12
4	76	84	4	252	246	228	240	-24	-6
4	92	85	4	138	174	114	162	-24	-12
4	84	86	4	165	9	90	12	-75	3
4	93	87	4	360	204	60	213	60	9
4	83	88	4	270	210	216	207	-54	-3
4	75	89	4	57	285	351	291	-66	6
4	95	90	4	129	129	123	108	-6	-21
4	80	91	4	327	99	315	90	-12	-9
4	87	92	4	348	60	351	69	3	9
4	74	93	4	174	303	165	324	-9	21
4	85	94	4	255	267	273	264	18	-3
4	81	95	4	36	291	48	309	12	18
4	94	96	4	9	156	6	144	-3	-12
4	105	97	5	201	318	222	333	21	15
4	99	98	5	270	153	201	123	-69	-30
4	109	99	5	105	141	105	129	0	-12
4	97	100	5	111	327	90	330	-21	3
4	108	101	5	303	72	312	87	9	15
4	120	102	5	306	270	306	267	0	-3
4	115	103	5	132	96	129	78	-3	-18
4	112	104	5	15	339	360	75	-15	96
4	103	105	5	300	309	309	318	9	9
4	98	106	5	339	225	327	243	-12	18
4	118	107	5	351	135	348	141	-3	6
4	101	108	5	174	246	186	228	12	-18
4	113	109	5	342	285	348	300	6	15
4	110	110	5	231	42	228	30	-3	-12
4	114	111	5	213	201	261	198	48	-3
4	104	112	5	150	237	123	234	-27	-3
4	111	113	5	93	180	354	177	-99	-3
4	106	114	5	336	3	315	27	-21	24
4	119	115	5	57	147	57	156	0	9
4	117	116	5	147	129	129	150	-18	21
4	102	117	5	153	21	165	30	12	9
4	100	118	5	345	33	348	27	3	-6
4	107	119	5	276	141	285	132	9	-9
4	116	120	5	225	201	228	198	3	-3
4	128	121	6	351	201	6	198	15	-3
4	127	122	6	69	75	81	87	12	12
4	139	123	6	93	300	60	303	-33	3
4	144	124	6	288	6	291	360	3	-6
4	121	125	6	345	147	12	153	27	6
4	122	126	6	249	240	228	249	-21	9
4	143	127	6	180	81	204	84	24	3
4	126	128	6	303	225	321	234	18	9
4	130	129	6	126	117	129	81	3	-36
4	133	130	6	327	195	324	189	-3	-6
4	132	131	6	18	90	339	87	-39	-3
4	142	132	6	216	309	213	291	-3	-18
4	134	133	6	156	36	114	6	-42	-30
4	124	134	6	219	252	210	249	-9	-3
4	141	135	6	42	45	45	42	3	-3
4	125	136	6	120	15	201	6	81	-9
4	137	137	6	165	30	138	39	-27	9
4	138	138	6	15	312	18	315	3	3
4	131	139	6	93	153	129	144	36	-9
4	123	140	6	30	150	42	159	12	9
4	129	141	6	111	219	126	216	15	-3
4	135	142	6	270	102	69	93	159	-9
4	136	143	6	3	117	69	123	66	6
4	140	144	6	204	138	252	147	48	9
5	18	1	1	45	243	360	237	-45	-6
5	10	2	1	117	81	114	75	-3	-6
5	4	3	1	309	174	357	270	48	96
5	8	4	1	204	33	270	81	66	48
5	16	5	1	309	171	288	207	-21	36
5	5	6	1	258	282	270	42	12	120
5	15	7	1	237	168	120	48	-117	-120
5	9	8	1	348	327	141	51	153	84
5	23	9	1	21	216	27	270	6	54
5	12	10	1	42	195	75	207	33	12
5	22	11	1	72	33	87	81	15	48
5	13	12	1	345	318	21	354	36	36
5	19	13	1	141	342	132	105	-9	123
5	21	14	1	204	192	210	150	6	-42
5	11	15	1	45	12	45	339	0	-33
5	2	16	1	126	309	141	246	15	-63
5	7	17	1	159	252	123	255	-36	3
5	1	18	1	360	51	342	69	-18	18
5	20	19	1	234	285	258	285	24	0
5	14	20	1	153	201	231	171	78	-30
5	17	21	1	132	288	204	297	72	9
5	24	22	1	261	135	216	336	-45	-159
5	3	23	1	249	54	63	210	174	156
5	6	24	1	297	12	300	348	3	-24
5	42	25	2	357	9	12	360	15	-9
5	34	26	2	105	84	126	99	21	15
5	30	27	2	153	348	117	354	-36	6
5	40	28	2	273	138	246	324	-27	-174
5	39	29	2	186	225	66	69	-120	-156
5	25	30	2	42	54	45	300	3	-114
5	27	31	2	54	174	3	183	-51	9
5	31	32	2	279	72	258	339	-21	-93
5	29	33	2	198	360	39	165	-159	165
5	47	34	2	276	225	234	228	-42	3
5	45	35	2	108	318	120	339	12	21
5	32	36	2	243	81	234	198	-9	117
5	36	37	2	57	327	36	285	-21	-42
5	35	38	2	162	312	195	351	33	39
5	44	39	2	153	342	120	333	-33	-9
5	38	40	2	216	240	219	213	3	-27
5	46	41	2	330	174	321	165	-9	-9
5	37	42	2	270	99	234	63	-36	-36
5	33	43	2	216	213	237	192	21	-21
5	43	44	2	183	216	240	129	57	-87
5	28	45	2	51	180	210	270	159	90
5	41	46	2	150	303	102	324	-48	21
5	26	47	2	18	156	24	216	6	60
5	48	48	2	90	129	33	147	-57	18
5	61	49	3	18	117	21	180	3	63
5	64	50	3	81	192	189	195	108	3
5	62	51	3	66	261	63	225	-3	-36
5	65	52	3	318	303	294	300	-24	-3
5	53	53	3	72	327	87	318	15	-9
5	59	54	3	192	246	216	45	24	159
5	51	55	3	93	177	60	138	-33	-39
5	56	56	3	117	207	138	222	21	15
5	70	57	3	27	69	15	75	-12	6
5	71	58	3	279	279	231	198	-48	-81
5	72	59	3	216	132	48	141	-168	9
5	57	60	3	144	27	126	24	-18	-3
5	49	61	3	288	159	222	111	-66	-48
5	60	62	3	219	183	234	195	15	12
5	50	63	3	339	216	357	210	18	-6
5	67	64	3	78	351	264	354	-174	3
5	55	65	3	333	357	135	120	162	123
5	58	66	3	261	351	33	36	132	45
5	52	67	3	33	312	342	303	-51	-9
5	66	68	3	72	126	201	27	129	-99
5	68	69	3	147	201	318	216	171	15
5	69	70	3	192	294	237	288	45	-6
5	54	71	3	234	306	210	309	-24	3
5	63	72	3	147	78	159	54	12	-24
5	73	73	4	66	168	138	165	72	-3
5	83	74	4	342	33	333	36	-9	3
5	88	75	4	123	45	117	48	-6	3
5	87	76	4	42	267	3	261	-39	-6
5	82	77	4	324	261	342	186	18	-75
5	84	78	4	348	270	12	273	24	3
5	77	79	4	279	87	246	81	-33	-6
5	89	80	4	270	132	270	282	0	150
5	78	81	4	189	333	192	123	3	150
5	95	82	4	48	228	54	213	6	-15
5	76	83	4	87	138	159	147	72	9
5	90	84	4	297	138	330	135	33	-3
5	86	85	4	288	153	288	147	0	-6
5	79	86	4	204	48	237	51	33	3
5	81	87	4	123	18	135	21	12	3
5	75	88	4	174	273	225	240	51	-33
5	80	89	4	96	36	144	24	48	-12
5	91	90	4	147	339	147	339	0	0
5	96	91	4	327	204	306	222	-21	18
5	93	92	4	51	147	27	162	-24	15
5	94	93	4	21	180	357	195	-24	15
5	92	94	4	180	186	39	237	-141	51
5	74	95	4	216	96	222	114	6	18
5	85	96	4	330	354	78	360	108	6
5	107	97	5	204	342	261	123	57	141
5	111	98	5	102	39	99	210	-3	171
5	105	99	5	282	156	225	213	-57	57
5	110	100	5	315	66	315	99	0	33
5	120	101	5	234	336	147	342	-87	6
5	97	102	5	345	330	354	330	9	0
5	106	103	5	240	147	186	165	-54	18
5	98	104	5	45	24	63	30	18	6
5	119	105	5	216	258	321	84	105	-174
5	114	106	5	27	120	15	195	-12	75
5	99	107	5	198	222	90	165	-108	-57
5	104	108	5	339	60	6	63	27	3
5	108	109	5	48	72	48	81	0	9
5	115	110	5	165	219	84	231	-81	12
5	109	111	5	225	324	225	279	0	-45
5	101	112	5	183	186	66	192	-117	6
5	112	113	5	336	309	36	204	60	-105
5	116	114	5	75	201	78	285	3	84
5	103	115	5	18	270	279	273	-99	3
5	102	116	5	309	279	303	285	-6	6
5	100	117	5	282	276	279	261	-3	-15
5	117	118	5	63	246	57	249	-6	3
5	113	119	5	123	9	48	357	-75	-12
5	118	120	5	294	117	285	114	-9	-3
6	1	1	1	321	351	168	351	-153	0
6	7	2	1	12	303	348	285	-24	-18
6	18	3	1	117	48	111	195	-6	147
6	16	4	1	327	180	354	183	27	3
6	19	5	1	15	177	342	105	-33	-72
6	22	6	1	111	246	144	12	33	126
6	9	7	1	348	246	345	261	-3	15
6	15	8	1	72	264	315	243	-117	-21
6	17	9	1	294	126	21	216	87	90
6	21	10	1	111	18	87	24	-24	6
6	8	11	1	195	117	114	171	-81	54
6	23	12	1	24	63	180	258	156	-165
6	5	13	1	9	159	39	165	30	6
6	6	14	1	327	222	333	171	6	-51
6	13	15	1	177	105	63	15	-114	-90
6	11	16	1	204	114	348	57	144	-57
6	14	17	1	171	96	279	102	108	6
6	24	18	1	87	171	126	180	39	9
6	2	19	1	273	39	9	90	96	51
6	20	20	1	273	3	39	9	126	6
6	12	21	1	45	174	33	75	-12	-99
6	4	22	1	75	243	306	135	-129	-108
6	3	23	1	15	351	36	357	21	6
6	10	24	1	318	258	39	243	81	-15
6	44	25	2	201	240	189	264	-12	24
6	32	26	2	54	102	234	54	-180	-48
6	47	27	2	333	6	309	3	-24	-3
6	48	28	2	354	96	348	108	-6	12
6	42	29	2	90	264	123	273	33	9
6	39	30	2	108	342	78	351	-30	9
6	25	31	2	273	318	270	291	-3	-27
6	38	32	2	225	171	318	297	93	126
6	31	33	2	120	312	93	312	-27	0
6	29	34	2	285	69	321	117	36	48
6	41	35	2	66	246	144	258	78	12
6	33	36	2	99	63	255	39	156	-24
6	37	37	2	180	216	177	204	-3	-12
6	28	38	2	345	159	336	132	-9	-27
6	34	39	2	321	192	123	360	162	168
6	26	40	2	138	27	138	93	0	66
6	35	41	2	141	12	309	12	168	0
6	45	42	2	345	102	345	321	0	-141
6	43	43	2	153	204	51	252	-102	48
6	27	44	2	228	45	303	60	75	15
6	40	45	2	24	354	351	354	-33	0
6	30	46	2	162	54	66	54	-96	0
6	46	47	2	78	117	75	117	-3	0
6	36	48	2	201	156	270	354	69	-162
6	50	49	3	321	297	345	297	24	0
6	66	50	3	36	264	321	273	-75	9
6	68	51	3	129	333	60	327	-69	-6
6	52	52	3	147	270	162	198	15	-72
6	71	53	3	222	90	243	99	21	9
6	56	54	3	81	171	72	153	-9	-18
6	57	55	3	336	192	327	126	-9	-66
6	65	56	3	360	198	357	201	-3	3
6	53	57	3	3	12	330	18	-33	6
6	60	58	3	312	321	351	21	39	60
6	62	59	3	234	63	96	126	-138	63
6	49	60	3	123	159	9	138	-114	-21
6	72	61	3	132	72	201	3	69	-69
6	70	62	3	210	213	138	198	-72	-15
6	61	63	3	204	240	210	138	6	-102
6	63	64	3	276	45	111	66	-165	21
6	69	65	3	201	354	120	354	-81	0
6	51	66	3	15	231	288	225	-87	-6
6	55	67	3	210	60	21	12	171	-48
6	58	68	3	336	318	225	306	-111	-12
6	54	69	3	309	183	309	12	0	-171
6	67	70	3	69	24	72	9	3	-15
6	64	71	3	129	108	153	108	24	0
6	59	72	3	270	243	321	33	51	150
6	75	73	4	270	330	198	324	-72	-6
6	95	74	4	225	42	186	15	-39	-27
6	79	75	4	126	336	87	333	-39	-3
6	84	76	4	54	177	45	180	-9	3
6	86	77	4	288	276	237	294	-51	18
6	93	78	4	315	9	357	6	42	-3
6	88	79	4	9	297	3	156	-6	-141
6	77	80	4	318	285	153	285	-165	0
6	81	81	4	222	57	237	66	15	9
6	85	82	4	30	198	351	201	-39	3
6	92	83	4	192	18	225	24	33	6
6	73	84	4	99	327	228	21	129	54
6	94	85	4	66	222	75	141	9	-81
6	90	86	4	30	282	6	78	-24	156
6	76	87	4	21	294	9	288	-12	-6
6	74	88	4	315	342	306	351	-9	9
6	78	89	4	312	39	231	30	-81	-9
6	87	90	4	183	219	228	147	45	-72
6	82	91	4	195	99	84	117	-111	18
6	80	92	4	105	198	144	198	39	0
6	96	93	4	237	114	360	117	123	3
6	91	94	4	321	69	117	69	156	0
6	83	95	4	135	315	204	39	69	84
6	89	96	4	120	207	123	300	3	93
6	114	97	5	249	93	222	93	-27	0
6	111	98	5	201	165	42	6	-159	-159
6	100	99	5	96	138	210	138	114	0
6	112	100	5	234	288	138	210	-96	-78
6	99	101	5	288	51	18	219	90	168
6	110	102	5	84	231	336	234	-108	3
6	109	103	5	60	318	60	327	0	9
6	102	104	5	156	138	147	342	-9	-156
6	98	105	5	357	234	6	39	9	165
6	115	106	5	306	357	297	3	-9	6
6	101	107	5	18	120	3	138	-15	18
6	106	108	5	309	42	342	234	33	-168
6	116	109	5	81	318	120	318	39	0
6	119	110	5	153	111	120	345	-33	-126
6	103	111	5	12	216	12	195	0	-21
6	113	112	5	156	189	162	192	6	3
6	104	113	5	300	282	324	294	24	12
6	118	114	5	252	15	213	48	-39	33
6	107	115	5	30	231	9	237	-21	6
6	108	116	5	252	39	210	21	-42	-18
6	97	117	5	336	75	318	72	-18	-3
6	105	118	5	204	228	84	255	-120	27
6	120	119	5	105	114	141	96	36	-18
6	117	120	5	132	39	351	39	-141	0
6	131	121	6	39	36	351	33	-48	-3
6	143	122	6	177	156	288	156	111	0
6	142	123	6	222	150	237	132	15	-18
6	140	124	6	210	114	312	114	102	0
6	130	125	6	93	285	195	147	102	-138
6	132	126	6	9	213	3	204	-6	-9
6	138	127	6	303	360	234	360	-69	0
6	137	128	6	267	96	24	105	117	9
6	123	129	6	315	357	306	357	-9	0
6	144	130	6	186	234	207	117	21	-117
6	127	131	6	357	180	30	183	33	3
6	126	132	6	192	312	156	45	-36	93
6	141	133	6	150	291	324	285	174	-6
6	125	134	6	273	291	234	285	-39	-6
6	121	135	6	69	57	60	57	-9	0
6	128	136	6	258	354	228	6	-30	12
6	134	137	6	90	291	144	303	54	12
6	124	138	6	285	297	324	315	39	18
6	135	139	6	120	36	105	33	-15	-3
6	129	140	6	303	225	177	231	-126	6
6	136	141	6	21	45	336	54	-45	9
6	122	142	6	336	342	219	345	-117	3
6	133	143	6	315	150	327	183	12	33
6	139	144	6	84	108	294	90	-150	-18
7	3	1	1	318	351	351	120	33	129
7	1	2	1	144	183	294	195	150	12
7	16	3	1	102	150	120	126	18	-24
7	15	4	1	249	57	285	45	36	-12
7	13	5	1	132	102	141	75	9	-27
7	17	6	1	24	3	189	147	165	144
7	18	7	1	135	222	132	276	-3	54
7	20	8	1	15	120	21	207	6	87
7	22	9	1	225	321	219	327	-6	6
7	2	10	1	105	111	300	240	-165	129
7	10	11	1	201	168	210	27	9	-141
7	23	12	1	333	87	300	90	-33	3
7	5	13	1	33	294	33	207	0	-87
7	9	14	1	231	258	324	51	93	153
7	4	15	1	87	9	303	354	-144	-15
7	7	16	1	294	231	282	231	-12	0
7	12	17	1	96	48	321	105	-135	57
7	19	18	1	276	222	321	267	45	45
7	6	19	1	267	276	330	267	63	-9
7	21	20	1	30	195	6	126	-24	-69
7	14	21	1	273	267	141	357	-132	90
7	24	22	1	321	150	123	117	162	-33
7	11	23	1	231	141	42	183	171	42
7	8	24	1	27	105	120	90	93	-15
7	37	25	2	264	201	129	120	-135	-81
7	46	26	2	255	168	147	255	-108	87
7	30	27	2	201	93	225	84	24	-9
7	48	28	2	249	201	297	123	48	-78
7	36	29	2	24	294	357	279	-27	-15
7	33	30	2	249	27	171	198	-78	171
7	39	31	2	261	240	207	273	-54	33
7	41	32	2	357	219	57	132	60	-87
7	29	33	2	207	108	192	45	-15	-63
7	47	34	2	210	171	339	336	129	165
7	38	35	2	327	45	117	36	150	-9
7	44	36	2	120	189	135	195	15	6
7	31	37	2	201	123	180	276	-21	153
7	27	38	2	135	117	141	114	6	-3
7	28	39	2	120	279	219	222	99	-57
7	26	40	2	51	315	72	315	21	0
7	40	41	2	69	246	87	90	18	-156
7	32	42	2	48	129	354	225	-54	96
7	25	43	2	75	357	57	342	-18	-15
7	45	44	2	201	219	165	330	-36	111
7	35	45	2	339	69	303	180	-36	111
7	34	46	2	21	69	156	180	135	111
7	43	47	2	117	324	306	201	-171	-123
7	42	48	2	273	54	315	63	42	9
7	51	49	3	222	45	309	210	87	165
7	56	50	3	315	165	18	258	63	93
7	59	51	3	57	324	327	324	-90	0
7	66	52	3	348	195	273	207	-75	12
7	60	53	3	219	357	96	333	-123	-24
7	61	54	3	156	69	129	78	-27	9
7	50	55	3	123	276	99	288	-24	12
7	64	56	3	159	279	117	189	-42	-90
7	65	57	3	48	291	81	342	33	51
7	58	58	3	81	96	306	225	-135	129
7	52	59	3	300	96	303	117	3	21
7	72	60	3	291	198	177	285	-114	87
7	54	61	3	12	75	207	198	-165	123
7	70	62	3	99	138	90	144	-9	6
7	71	63	3	138	300	288	207	150	-93
7	57	64	3	129	240	72	255	-57	15
7	67	65	3	84	360	72	354	-12	-6
7	68	66	3	228	21	294	114	66	93
7	53	67	3	36	156	261	306	-135	150
7	55	68	3	279	90	201	105	-78	15
7	49	69	3	288	183	336	183	48	0
7	69	70	3	201	6	255	330	54	-36
7	63	71	3	3	147	12	168	9	21
7	62	72	3	27	237	324	189	-63	-48
7	77	73	4	90	174	105	189	15	15
7	96	74	4	198	105	177	321	-21	-144
7	76	75	4	294	357	27	60	93	63
7	85	76	4	333	228	6	228	33	0
7	83	77	4	234	27	141	183	-93	156
7	79	78	4	315	312	318	273	3	-39
7	86	79	4	45	156	42	177	-3	21
7	95	80	4	144	219	312	297	168	78
7	93	81	4	327	300	219	300	-108	0
7	89	82	4	345	159	357	357	12	-162
7	81	83	4	309	12	306	18	-3	6
7	78	84	4	201	318	273	156	72	-162
7	88	85	4	36	12	63	18	27	6
7	90	86	4	216	129	84	129	-132	0
7	73	87	4	24	222	102	264	78	42
7	94	88	4	9	102	351	111	-18	9
7	92	89	4	102	357	123	102	21	105
7	84	90	4	21	333	54	6	33	33
7	87	91	4	120	108	99	114	-21	6
7	75	92	4	132	249	306	183	174	-66
7	82	93	4	324	273	327	291	3	18
7	80	94	4	216	297	201	288	-15	-9
7	91	95	4	258	201	141	216	-117	15
7	74	96	4	138	147	138	315	0	168
7	97	97	5	219	165	231	147	12	-18
7	106	98	5	33	327	33	342	0	15
7	119	99	5	30	60	6	27	-24	-33
7	111	100	5	276	96	273	96	-3	0
7	116	101	5	12	231	354	90	-18	-141
7	109	102	5	264	84	42	63	138	-21
7	120	103	5	162	12	177	354	15	-18
7	118	104	5	291	126	69	156	138	30
7	113	105	5	138	240	81	255	-57	15
7	117	106	5	81	96	60	93	-21	-3
7	107	107	5	177	303	54	249	-123	-54
7	104	108	5	174	294	186	279	12	-15
7	112	109	5	210	177	207	204	-3	27
7	101	110	5	327	93	309	99	-18	6
7	99	111	5	141	351	183	237	42	-114
7	98	112	5	357	36	360	207	3	171
7	114	113	5	3	144	351	138	-12	-6
7	105	114	5	183	195	348	180	165	-15
7	115	115	5	105	186	63	81	-42	-105
7	100	116	5	195	351	225	237	30	-114
7	108	117	5	105	24	180	126	75	102
7	110	118	5	306	51	321	3	15	-48
7	103	119	5	249	87	360	75	111	-12
7	102	120	5	231	303	186	294	-45	-9
7	124	121	6	270	261	240	192	-30	-69
7	140	122	6	159	162	195	36	36	-126
7	131	123	6	315	33	207	189	-108	156
7	125	124	6	333	159	21	171	48	12
7	144	125	6	51	144	60	126	9	-18
7	136	126	6	78	87	72	84	-6	-3
7	130	127	6	105	9	51	12	-54	3
7	133	128	6	132	126	189	174	57	48
7	139	129	6	330	69	45	294	75	-135
7	142	130	6	258	333	252	351	-6	18
7	143	131	6	138	18	315	279	177	-99
7	122	132	6	54	246	3	225	-51	-21
7	127	133	6	18	297	6	285	-12	-12
7	141	134	6	195	87	78	90	-117	3
7	123	135	6	291	102	312	114	21	12
7	137	136	6	207	186	195	96	-12	-90
7	121	137	6	213	66	180	168	-33	102
7	138	138	6	144	345	324	216	-180	-129
7	134	139	6	276	105	237	117	-39	12
7	129	140	6	231	339	165	330	-66	-9
7	126	141	6	6	252	147	357	141	105
7	128	142	6	39	345	204	336	165	-9
7	135	143	6	111	201	45	186	-66	-15
7	132	144	6	45	252	174	54	129	162
9	28	25	2	99	267	126	258	27	-9
9	36	26	2	195	237	315	309	120	72
9	43	27	2	15	156	306	237	-69	81
9	31	28	2	297	114	216	306	-81	-168
9	44	29	2	303	18	207	354	-96	-24
9	45	30	2	75	78	297	75	-138	-3
9	42	31	2	315	309	114	303	159	-6
9	25	32	2	186	231	255	240	69	9
9	47	33	2	339	285	300	105	-39	-180
9	26	34	2	360	237	24	159	24	-78
9	39	35	2	255	93	234	78	-21	-15
9	37	36	2	171	180	120	180	-51	0
9	38	37	2	270	357	111	24	-159	27
9	41	38	2	96	114	81	345	-15	-129
9	30	39	2	174	21	75	195	-99	174
9	48	40	2	282	285	93	21	171	96
9	40	41	2	87	138	297	141	-150	3
9	33	42	2	141	120	93	96	-48	-24
9	27	43	2	150	15	279	261	129	-114
9	35	44	2	261	60	216	102	-45	42
9	46	45	2	66	288	60	207	-6	-81
9	29	46	2	132	126	45	87	-87	-39
9	32	47	2	357	93	354	138	-3	45
9	34	48	2	219	324	93	111	-126	147
9	64	49	3	123	300	111	189	-12	-111
9	58	50	3	42	48	342	135	-60	87
9	67	51	3	267	204	222	84	-45	-120
9	72	52	3	225	192	225	285	0	93
9	52	53	3	285	234	150	321	-135	87
9	57	54	3	66	237	33	168	-33	-69
9	70	55	3	231	342	237	360	6	18
9	68	56	3	255	252	270	258	15	6
9	51	57	3	69	186	45	189	-24	3
9	61	58	3	204	87	216	321	12	-126
9	66	59	3	276	237	30	309	114	72
9	62	60	3	339	84	318	87	-21	3
9	71	61	3	144	315	96	327	-48	12
9	49	62	3	174	291	183	297	9	6
9	55	63	3	126	144	111	135	-15	-9
9	63	64	3	12	348	342	336	-30	-12
9	65	65	3	228	102	270	117	42	15
9	56	66	3	195	261	81	318	-114	57
9	60	67	3	342	159	342	129	0	-30
9	53	68	3	270	39	225	15	-45	-24
9	54	69	3	192	18	99	9	-93	-9
9	69	70	3	168	9	231	279	63	-90
9	59	71	3	96	159	108	132	12	-27
9	50	72	3	9	228	21	99	12	-129
9	76	73	4	72	261	72	327	0	66
9	88	74	4	219	189	234	144	15	-45
9	93	75	4	342	162	360	153	18	-9
9	85	76	4	90	303	150	120	60	177
9	94	77	4	321	54	303	297	-18	-117
9	95	78	4	249	63	213	36	-36	-27
9	79	79	4	285	57	282	42	-3	-15
9	75	80	4	234	96	228	90	-6	-6
9	86	81	4	351	237	24	207	33	-30
9	87	82	4	150	195	141	210	-9	15
9	96	83	4	15	138	141	135	126	-3
9	80	84	4	288	192	303	126	15	-66
9	82	85	4	21	312	87	309	66	-3
9	74	86	4	54	348	120	357	66	9
9	90	87	4	117	327	36	132	-81	165
9	83	88	4	39	6	273	360	-126	-6
9	84	89	4	132	36	150	12	18	-24
9	89	90	4	240	207	33	105	153	-102
9	78	91	4	183	276	300	273	117	-3
9	73	92	4	204	114	252	114	48	0
9	91	93	4	138	48	129	42	-9	-6
9	77	94	4	117	297	90	285	-27	-12
9	92	95	4	306	87	42	123	96	36
9	81	96	4	228	117	246	342	18	-135
9	115	97	5	339	225	360	93	21	-132
9	120	98	5	240	198	240	201	0	3
9	98	99	5	60	303	126	288	66	-15
9	104	100	5	90	288	48	294	-42	6
9	101	101	5	291	24	300	18	9	-6
9	103	102	5	141	15	93	60	-48	45
9	106	103	5	246	66	87	231	-159	165
9	109	104	5	198	303	21	327	-177	24
9	111	105	5	48	321	171	312	123	-9
9	105	106	5	279	27	87	135	168	108
9	100	107	5	216	54	237	63	21	9
9	114	108	5	18	333	306	348	-72	15
9	108	109	5	156	255	39	279	-117	24
9	99	110	5	360	294	327	312	-33	18
9	110	111	5	153	108	126	120	-27	12
9	116	112	5	309	276	63	327	114	51
9	117	113	5	144	96	354	93	-150	-3
9	118	114	5	351	159	294	222	-57	63
9	113	115	5	87	150	144	180	57	30
9	119	116	5	36	180	48	180	12	0
9	102	117	5	210	339	219	342	9	3
9	112	118	5	315	228	306	84	-9	-144
9	107	119	5	276	105	45	42	129	-63
9	97	120	5	360	360	309	360	-51	0
9	132	121	6	309	117	147	117	-162	0
9	135	122	6	231	351	216	309	-15	-42
9	123	123	6	30	33	348	33	-42	0
9	138	124	6	102	207	120	198	18	-9
9	143	125	6	330	303	3	318	33	15
9	140	126	6	150	237	24	312	-126	75
9	131	127	6	315	354	312	3	-3	9
9	136	128	6	321	15	333	9	12	-6
9	122	129	6	99	180	96	165	-3	-15
9	127	130	6	264	237	216	270	-48	33
9	128	131	6	96	66	99	15	3	-51
9	141	132	6	9	117	357	114	-12	-3
9	142	133	6	189	183	129	66	-60	-117
9	126	134	6	45	195	360	216	-45	21
9	137	135	6	267	84	240	126	-27	42
9	125	136	6	201	291	27	312	-174	21
9	124	137	6	252	141	225	159	-27	18
9	134	138	6	183	63	69	42	-114	-21
9	144	139	6	357	249	72	264	75	15
9	130	140	6	51	282	45	282	-6	0
9	139	141	6	345	351	33	348	48	-3
9	121	142	6	168	288	261	282	93	-6
9	129	143	6	198	303	309	228	111	-75
9	133	144	6	27	162	63	186	36	24
10	21	1	1	90	3	132	12	42	9
10	14	2	1	147	279	120	267	-27	-12
10	2	3	1	147	99	183	264	36	165
10	13	4	1	30	117	357	135	-33	18
10	1	5	1	3	42	45	24	42	-18
10	15	6	1	186	306	192	306	6	0
10	10	7	1	213	285	267	276	54	-9
10	19	8	1	285	90	231	99	-54	9
10	20	9	1	3	177	78	252	75	75
10	12	10	1	57	159	312	177	-105	18
10	5	11	1	102	174	105	324	3	150
10	24	12	1	213	342	270	327	57	-15
10	7	13	1	348	69	357	237	9	168
10	6	14	1	306	21	312	42	6	21
10	4	15	1	219	72	252	84	33	12
10	17	16	1	45	210	57	210	12	0
10	9	17	1	45	336	18	348	-27	12
10	23	18	1	333	99	42	81	69	-18
10	18	19	1	288	294	291	312	3	18
10	22	20	1	96	321	132	342	36	21
10	8	21	1	201	240	315	102	114	-138
10	16	22	1	315	222	306	222	-9	0
10	11	23	1	105	156	87	153	-18	-3
10	3	24	1	171	318	225	303	54	-15
10	34	25	2	144	33	144	39	0	6
10	31	26	2	192	114	18	117	-174	3
10	28	27	2	315	222	294	228	-21	6
10	27	28	2	255	357	267	6	12	9
10	38	29	2	261	279	261	270	0	-9
10	41	30	2	57	342	54	339	-3	-3
10	29	31	2	351	120	342	123	-9	3
10	36	32	2	219	219	225	216	6	-3
10	48	33	2	303	171	288	177	-15	6
10	43	34	2	141	336	147	336	6	0
10	37	35	2	63	228	63	237	0	9
10	35	36	2	270	45	240	318	-30	-87
10	26	37	2	177	30	189	360	12	-30
10	39	38	2	297	93	294	90	-3	-3
10	46	39	2	345	189	345	189	0	0
10	30	40	2	72	282	312	303	-120	21
10	47	41	2	105	114	138	156	33	42
10	33	42	2	129	345	54	69	-75	84
10	32	43	2	318	210	318	306	0	96
10	42	44	2	123	333	111	342	-12	9
10	45	45	2	99	270	114	288	15	18
10	25	46	2	39	84	36	81	-3	-3
10	40	47	2	345	150	33	138	48	-12
10	44	48	2	306	324	315	318	9	-6
10	58	49	3	72	18	66	27	-6	9
10	60	50	3	24	153	48	162	24	9
10	62	51	3	117	102	123	120	6	18
10	71	52	3	156	39	132	36	-24	-3
10	61	53	3	219	261	243	258	24	-3
10	70	54	3	168	69	186	60	18	-9
10	57	55	3	309	318	315	324	6	6
10	49	56	3	291	237	273	228	-18	-9
10	67	57	3	192	15	189	24	-3	9
10	72	58	3	360	141	357	144	-3	3
10	52	59	3	243	282	237	276	-6	-6
10	55	60	3	18	213	342	219	-36	6
10	59	61	3	294	123	279	123	-15	0
10	51	62	3	162	330	123	327	-39	-3
10	64	63	3	270	165	225	123	-45	-42
10	66	64	3	114	153	3	135	-111	-18
10	69	65	3	249	261	243	252	-6	-9
10	63	66	3	291	261	303	255	12	-6
10	68	67	3	81	168	99	174	18	6
10	65	68	3	66	114	81	111	15	-3
10	54	69	3	249	156	234	162	-15	6
10	50	70	3	225	51	240	60	15	9
10	53	71	3	204	246	234	258	30	12
10	56	72	3	108	39	126	36	18	-3
10	92	73	4	114	24	162	30	48	6
10	75	74	4	219	78	243	90	24	12
10	93	75	4	279	186	282	216	3	30
10	79	76	4	267	201	252	207	-15	6
10	78	77	4	267	237	264	252	-3	15
10	76	78	4	348	120	360	117	12	-3
10	84	79	4	312	144	318	150	6	6
10	88	80	4	342	42	339	45	-3	3
10	77	81	4	339	291	327	291	-12	0
10	81	82	4	126	237	117	246	-9	9
10	94	83	4	249	15	237	18	-12	3
10	96	84	4	195	225	207	222	12	-3
10	74	85	4	45	354	30	336	-15	-18
10	89	86	4	168	318	168	324	0	6
10	86	87	4	120	312	174	303	54	-9
10	95	88	4	174	141	168	132	-6	-9
10	85	89	4	45	273	48	255	3	-18
10	91	90	4	276	177	282	147	6	-30
10	90	91	4	93	303	102	318	9	15
10	83	92	4	354	177	51	189	57	12
10	73	93	4	87	354	84	354	-3	0
10	80	94	4	303	69	294	75	-9	6
10	87	95	4	192	132	198	138	6	6
10	82	96	4	39	69	360	96	-39	27
10	99	97	5	216	6	234	6	18	0
10	120	98	5	354	126	30	66	36	-60
10	113	99	5	264	255	255	267	-9	12
10	108	100	5	237	264	213	252	-24	-12
10	103	101	5	102	81	159	84	57	3
10	106	102	5	354	183	348	189	-6	6
10	115	103	5	174	309	177	318	3	9
10	100	104	5	162	180	138	180	-24	0
10	112	105	5	282	42	216	30	-66	-12
10	104	106	5	273	264	249	264	-24	0
10	101	107	5	66	174	69	171	3	-3
10	110	108	5	48	192	57	195	9	3
10	107	109	5	39	315	48	312	9	-3
10	117	110	5	294	75	300	75	6	0
10	111	111	5	105	6	132	24	27	18
10	109	112	5	333	9	333	21	0	12
10	102	113	5	63	126	45	114	-18	-12
10	114	114	5	234	186	210	171	-24	-15
10	97	115	5	168	285	162	294	-6	9
10	118	116	5	42	60	60	51	18	-9
10	105	117	5	171	177	93	189	-78	12
10	119	118	5	156	318	102	321	-54	3
10	116	119	5	252	258	228	258	-24	0
10	98	120	5	348	81	336	99	-12	18
10	130	121	6	99	51	96	45	-3	-6
10	143	122	6	216	360	198	360	-18	0
10	124	123	6	351	51	24	63	33	12
10	129	124	6	117	144	141	144	24	0
10	140	125	6	36	243	69	222	33	-21
10	121	126	6	192	354	216	354	24	0
10	127	127	6	102	252	129	255	27	3
10	139	128	6	144	300	132	300	-12	0
10	126	129	6	192	189	192	186	0	-3
10	138	130	6	273	204	249	207	-24	3
10	122	131	6	228	156	276	147	48	-9
10	128	132	6	243	189	264	201	21	12
10	131	133	6	105	252	138	255	33	3
10	132	134	6	228	321	228	312	0	-9
10	142	135	6	297	264	285	264	-12	0
10	125	136	6	99	12	162	15	63	3
10	135	137	6	324	318	285	324	-39	6
10	144	138	6	168	111	147	246	-21	135
10	141	139	6	147	99	132	90	-15	-9
10	134	140	6	3	213	15	216	12	3
10	137	141	6	306	123	288	105	-18	-18
10	133	142	6	48	27	51	45	3	18
10	136	143	6	180	30	255	72	75	42
10	123	144	6	240	15	249	6	9	-9
11	24	1	1	270	291	306	132	36	-159
11	21	2	1	132	117	165	27	33	-90
11	16	3	1	6	228	63	204	57	-24
11	15	4	1	18	171	276	186	-102	15
11	1	5	1	54	327	21	126	-33	159
11	10	6	1	27	252	186	111	159	-141
11	6	7	1	351	282	132	168	141	-114
11	14	8	1	165	330	9	231	-156	-99
11	18	9	1	39	75	279	60	-120	-15
11	5	10	1	309	63	138	117	-171	54
11	3	11	1	138	339	309	273	171	-66
11	20	12	1	75	333	330	333	-105	0
11	22	13	1	261	276	267	285	6	9
11	12	14	1	72	15	246	24	174	9
11	4	15	1	246	165	360	279	114	114
11	17	16	1	318	189	327	147	9	-42
11	19	17	1	246	135	234	204	-12	69
11	8	18	1	102	126	66	117	-36	-9
11	2	19	1	111	237	123	273	12	36
11	23	20	1	147	168	147	168	0	0
11	7	21	1	183	288	9	309	-174	21
11	11	22	1	63	108	99	135	36	27
11	13	23	1	273	219	33	240	120	21
11	9	24	1	108	282	297	198	-171	-84
11	32	25	2	207	141	231	147	24	6
11	28	26	2	102	39	147	45	45	6
11	39	27	2	111	24	42	18	-69	-6
11	29	28	2	57	12	264	210	-153	-162
11	47	29	2	300	96	108	60	168	-36
11	42	30	2	54	120	21	117	-33	-3
11	37	31	2	240	357	234	222	-6	-135
11	31	32	2	168	297	126	288	-42	-9
11	38	33	2	294	66	222	267	-72	-159
11	25	34	2	177	300	159	324	-18	24
11	44	35	2	201	228	210	63	9	-165
11	46	36	2	333	321	360	126	27	165
11	33	37	2	108	288	210	270	102	-18
11	48	38	2	300	228	288	186	-12	-42
11	36	39	2	294	180	309	189	15	9
11	30	40	2	282	96	240	96	-42	0
11	26	41	2	219	87	249	165	30	78
11	45	42	2	30	336	30	324	0	-12
11	41	43	2	189	315	177	300	-12	-15
11	35	44	2	87	108	147	102	60	-6
11	34	45	2	285	240	288	237	3	-3
11	40	46	2	126	159	267	150	141	-9
11	43	47	2	351	156	351	150	0	-6
11	27	48	2	237	63	243	96	6	33
11	49	49	3	258	15	315	9	57	-6
11	59	50	3	93	231	162	231	69	0
11	52	51	3	189	177	207	186	18	9
11	53	52	3	141	321	99	309	-42	-12
11	68	53	3	222	120	261	144	39	24
11	69	54	3	321	204	6	189	45	-15
11	67	55	3	300	312	297	168	-3	-144
11	70	56	3	249	36	255	78	6	42
11	66	57	3	225	129	210	345	-15	-144
11	63	58	3	30	36	66	189	36	153
11	64	59	3	351	168	6	177	15	9
11	58	60	3	24	327	207	276	-177	-51
11	51	61	3	333	147	342	135	9	-12
11	72	62	3	111	66	153	126	42	60
11	71	63	3	303	108	273	87	-30	-21
11	60	64	3	72	336	54	6	-18	30
11	57	65	3	195	87	285	102	90	15
11	62	66	3	66	63	66	348	0	-75
11	50	67	3	273	12	9	87	96	75
11	61	68	3	84	42	12	33	-72	-9
11	54	69	3	90	315	120	336	30	21
11	55	70	3	315	222	297	234	-18	12
11	56	71	3	51	249	78	165	27	-84
11	65	72	3	147	159	159	225	12	66
11	89	73	4	285	90	282	45	-3	-45
11	78	74	4	111	171	153	354	42	-177
11	93	75	4	165	249	162	222	-3	-27
11	86	76	4	48	18	54	222	6	-156
11	83	77	4	114	207	135	177	21	-30
11	95	78	4	180	237	177	120	-3	-117
11	85	79	4	114	33	129	330	15	-63
11	76	80	4	135	189	168	135	33	-54
11	90	81	4	219	141	204	126	-15	-15
11	92	82	4	342	312	3	240	21	-72
11	79	83	4	249	48	243	42	-6	-6
11	73	84	4	282	165	135	129	-147	-36
11	91	85	4	186	273	207	303	21	30
11	77	86	4	12	348	6	345	-6	-3
11	96	87	4	27	42	18	51	-9	9
11	74	88	4	66	105	270	99	-156	-6
11	82	89	4	345	267	357	261	12	-6
11	80	90	4	333	102	3	105	30	3
11	75	91	4	123	186	87	180	-36	-6
11	87	92	4	231	333	240	108	9	135
11	81	93	4	318	123	39	114	81	-9
11	94	94	4	276	201	285	111	9	-90
11	88	95	4	24	33	198	120	174	87
11	84	96	4	225	333	225	153	0	-180
11	116	97	5	135	234	144	159	9	-75
11	100	98	5	198	225	228	228	30	3
11	120	99	5	282	177	255	177	-27	0
11	110	100	5	165	66	123	39	-42	-27
11	101	101	5	348	150	354	54	6	-96
11	109	102	5	3	246	24	168	21	-78
11	112	103	5	78	198	87	240	9	42
11	115	104	5	195	237	189	237	-6	0
11	98	105	5	252	18	270	360	18	-18
11	108	106	5	33	342	12	333	-21	-9
11	119	107	5	111	30	132	81	21	51
11	117	108	5	210	69	255	81	45	12
11	105	109	5	300	114	12	153	72	39
11	118	110	5	42	120	54	162	12	42
11	107	111	5	228	339	237	318	9	-21
11	99	112	5	60	333	54	141	-6	168
11	106	113	5	300	72	300	90	0	18
11	102	114	5	36	312	333	300	-63	-12
11	114	115	5	231	54	222	210	-9	156
11	104	116	5	357	204	12	198	15	-6
11	113	117	5	288	156	291	159	3	3
11	97	118	5	93	282	141	291	48	9
11	103	119	5	273	312	246	42	-27	90
11	111	120	5	165	249	189	357	24	108
11	142	121	6	222	108	213	129	-9	21
11	144	122	6	114	237	96	228	-18	-9
11	129	123	6	291	330	177	15	-114	45
11	139	124	6	303	48	297	36	-6	-12
11	138	125	6	72	42	129	72	57	30
11	124	126	6	351	324	9	138	18	174
11	143	127	6	24	291	351	276	-33	-15
11	121	128	6	96	75	117	75	21	0
11	135	129	6	54	159	54	165	0	6
11	134	130	6	33	6	87	171	54	165
11	122	131	6	198	144	246	141	48	-3
11	123	132	6	48	348	78	63	30	75
11	132	133	6	357	27	18	12	21	-15
11	127	134	6	21	324	12	225	-9	-99
11	126	135	6	261	108	225	225	-36	117
11	141	136	6	87	279	138	27	51	108
11	130	137	6	141	69	99	21	-42	-48
11	136	138	6	198	246	207	234	9	-12
11	125	139	6	219	165	213	285	-6	120
11	131	140	6	318	192	303	201	-15	9
11	140	141	6	162	339	123	360	-39	21
11	128	142	6	270	177	267	321	-3	144
11	137	143	6	237	219	243	258	6	39
11	133	144	6	327	300	282	321	-45	21
13	1	1	1	135	195	96	162	-39	-33
13	14	2	1	213	138	255	153	42	15
13	7	3	1	261	156	147	153	-114	-3
13	3	4	1	252	135	270	171	18	36
13	12	5	1	303	102	126	300	-177	-162
13	21	6	1	351	285	336	102	-15	177
13	16	7	1	135	105	81	345	-54	-120
13	8	8	1	75	111	360	201	-75	90
13	17	9	1	189	42	228	45	39	3
13	4	10	1	198	213	117	216	-81	3
13	5	11	1	159	51	111	57	-48	6
13	24	12	1	87	12	75	27	-12	15
13	18	13	1	315	138	300	138	-15	0
13	11	14	1	6	312	342	237	-24	-75
13	23	15	1	183	333	195	321	12	-12
13	13	16	1	306	348	264	348	-42	0
13	19	17	1	66	288	72	285	6	-3
13	22	18	1	309	9	60	51	111	42
13	10	19	1	249	258	3	309	114	51
13	15	20	1	285	300	237	303	-48	3
13	6	21	1	126	189	30	96	-96	-93
13	9	22	1	90	243	15	183	-75	-60
13	20	23	1	18	357	24	9	6	12
13	2	24	1	81	243	183	90	102	-153
13	41	25	2	66	147	357	162	-69	15
13	27	26	2	276	9	243	18	-33	9
13	46	27	2	27	306	24	303	-3	-3
13	33	28	2	48	192	9	183	-39	-9
13	39	29	2	294	252	264	270	-30	18
13	31	30	2	138	39	51	36	-87	-3
13	36	31	2	201	282	261	282	60	0
13	45	32	2	147	198	81	210	-66	12
13	47	33	2	261	207	279	213	18	6
13	35	34	2	288	141	279	132	-9	-9
13	25	35	2	147	318	249	192	102	-126
13	28	36	2	240	9	276	15	36	6
13	43	37	2	78	267	45	291	-33	24
13	40	38	2	198	60	243	84	45	24
13	26	39	2	201	270	231	285	30	15
13	34	40	2	12	186	3	198	-9	12
13	29	41	2	6	204	360	228	-6	24
13	30	42	2	171	102	84	342	-87	-120
13	42	43	2	72	282	69	276	-3	-6
13	38	44	2	129	312	75	321	-54	9
13	48	45	2	150	138	231	231	81	93
13	32	46	2	357	249	9	225	12	-24
13	37	47	2	264	360	270	84	6	84
13	44	48	2	327	54	312	39	-15	-15
13	52	49	3	303	102	297	102	-6	0
13	57	50	3	321	351	90	126	129	135
13	50	51	3	33	228	336	225	-57	-3
13	64	52	3	189	327	180	309	-9	-18
13	62	53	3	45	39	27	54	-18	15
13	51	54	3	99	249	102	243	3	-6
13	66	55	3	147	15	147	18	0	3
13	56	56	3	87	78	66	324	-21	-114
13	69	57	3	12	126	6	117	-6	-9
13	65	58	3	33	156	243	159	-150	3
13	71	59	3	276	177	282	171	6	-6
13	58	60	3	351	222	240	228	-111	6
13	60	61	3	228	330	258	327	30	-3
13	72	62	3	321	270	321	273	0	3
13	68	63	3	294	291	60	156	126	-135
13	49	64	3	300	153	300	168	0	15
13	55	65	3	102	87	111	90	9	3
13	70	66	3	180	108	204	315	24	-153
13	53	67	3	180	285	225	279	45	-6
13	63	68	3	225	57	261	321	36	-96
13	67	69	3	216	135	222	132	6	-3
13	59	70	3	57	348	210	219	153	-129
13	54	71	3	252	30	276	33	24	3
13	61	72	3	315	360	324	360	9	0
13	91	73	4	93	177	90	174	-3	-3
13	79	74	4	129	156	141	219	12	63
13	73	75	4	270	24	255	237	-15	-147
13	85	76	4	171	249	234	144	63	-105
13	94	77	4	309	156	270	153	-39	-3
13	87	78	4	348	225	270	90	-78	-135
13	93	79	4	279	99	309	96	30	-3
13	84	80	4	186	87	135	246	-51	159
13	89	81	4	300	3	294	12	-6	9
13	88	82	4	195	300	228	300	33	0
13	90	83	4	141	288	108	282	-33	-6
13	78	84	4	204	72	231	48	27	-24
13	80	85	4	15	252	3	243	-12	-9
13	75	86	4	225	21	234	33	9	12
13	74	87	4	285	117	228	99	-57	-18
13	76	88	4	15	348	330	360	-45	12
13	86	89	4	36	264	354	252	-42	-12
13	92	90	4	204	33	216	315	12	-78
13	83	91	4	360	114	93	3	93	-111
13	95	92	4	63	165	69	156	6	-9
13	96	93	4	159	309	57	60	-102	111
13	81	94	4	249	348	228	342	-21	-6
13	77	95	4	84	183	348	324	-96	141
13	82	96	4	105	153	111	168	6	15
13	104	97	5	81	255	57	261	-24	6
13	113	98	5	348	348	213	165	-135	177
13	110	99	5	213	201	234	318	21	117
13	118	100	5	210	309	264	315	54	6
13	107	101	5	12	318	360	318	-12	0
13	99	102	5	282	99	264	84	-18	-15
13	97	103	5	9	297	36	285	27	-12
13	115	104	5	36	54	15	60	-21	6
13	102	105	5	198	258	219	240	21	-18
13	98	106	5	321	51	312	51	-9	0
13	112	107	5	60	33	51	180	-9	147
13	114	108	5	303	135	300	147	-3	12
13	106	109	5	354	204	27	210	33	6
13	117	110	5	285	156	294	138	9	-18
13	111	111	5	159	156	231	15	72	-141
13	100	112	5	270	138	9	360	99	-138
13	108	113	5	90	36	102	42	12	6
13	109	114	5	105	201	114	192	9	-9
13	119	115	5	294	66	69	123	135	57
13	101	116	5	6	270	360	264	-6	-6
13	103	117	5	72	243	90	240	18	-3
13	105	118	5	171	30	198	24	27	-6
13	120	119	5	51	138	345	138	-66	0
13	116	120	5	57	144	69	144	12	0
14	21	1	1	318	72	330	201	12	129
14	22	2	1	30	306	42	294	12	-12
14	16	3	1	171	66	168	63	-3	-3
14	7	4	1	150	39	24	285	-126	-114
14	6	5	1	282	39	285	36	3	-3
14	12	6	1	75	204	162	201	87	-3
14	24	7	1	282	258	297	246	15	-12
14	19	8	1	123	84	96	90	-27	6
14	18	9	1	186	261	195	258	9	-3
14	23	10	1	36	234	39	225	3	-9
14	9	11	1	18	15	360	15	-18	0
14	10	12	1	63	156	48	159	-15	3
14	5	13	1	186	162	207	114	21	-48
14	17	14	1	123	285	174	222	51	-63
14	14	15	1	267	180	141	132	-126	-48
14	11	16	1	171	216	207	207	36	-9
14	1	17	1	114	213	96	87	-18	-126
14	3	18	1	333	156	333	162	0	6
14	15	19	1	318	330	306	324	-12	-6
14	2	20	1	195	123	204	111	9	-12
14	4	21	1	120	123	120	120	0	-3
14	13	22	1	309	312	282	207	-27	-105
14	8	23	1	267	285	225	231	-42	-54
14	20	24	1	237	57	246	351	9	-66
14	47	25	2	123	309	147	312	24	3
14	28	26	2	69	117	33	108	-36	-9
14	33	27	2	306	57	294	51	-12	-6
14	27	28	2	165	90	138	87	-27	-3
14	45	29	2	249	72	252	87	3	15
14	46	30	2	297	216	294	210	-3	-6
14	42	31	2	12	171	12	165	0	-6
14	35	32	2	147	18	141	24	-6	6
14	40	33	2	324	78	42	75	78	-3
14	36	34	2	126	198	126	192	0	-6
14	32	35	2	339	111	339	105	0	-6
14	41	36	2	9	60	3	51	-6	-9
14	38	37	2	291	345	294	351	3	6
14	43	38	2	153	165	129	168	-24	3
14	37	39	2	15	231	18	240	3	9
14	26	40	2	78	294	315	3	-123	69
14	31	41	2	249	15	234	12	-15	-3
14	39	42	2	243	141	243	135	0	-6
14	30	43	2	42	255	36	243	-6	-12
14	48	44	2	357	192	12	192	15	0
14	44	45	2	99	258	135	252	36	-6
14	25	46	2	255	144	258	156	3	12
14	34	47	2	210	120	213	117	3	-3
14	29	48	2	126	279	132	276	6	-3
14	64	49	3	69	240	54	264	-15	24
14	53	50	3	294	96	300	78	6	-18
14	50	51	3	111	90	129	90	18	0
14	51	52	3	294	249	297	246	3	-3
14	67	53	3	48	117	42	111	-6	-6
14	69	54	3	261	360	255	6	-6	6
14	52	55	3	108	90	138	81	30	-9
14	56	56	3	135	171	309	186	174	15
14	63	57	3	213	300	243	291	30	-9
14	70	58	3	222	51	264	102	42	51
14	59	59	3	315	150	306	171	-9	21
14	61	60	3	207	264	243	273	36	9
14	68	61	3	18	186	9	183	-9	-3
14	60	62	3	129	102	150	117	21	15
14	57	63	3	102	132	156	123	54	-9
14	72	64	3	282	171	234	351	-48	180
14	49	65	3	267	294	261	285	-6	-9
14	54	66	3	21	279	18	288	-3	9
14	66	67	3	57	234	69	219	12	-15
14	62	68	3	213	3	264	9	51	6
14	58	69	3	339	177	6	180	27	3
14	65	70	3	225	60	246	60	21	0
14	71	71	3	324	177	30	168	66	-9
14	55	72	3	159	345	138	3	-21	18
14	80	73	4	126	57	138	66	12	9
14	84	74	4	264	303	264	303	0	0
14	81	75	4	114	168	75	174	-39	6
14	91	76	4	327	306	324	333	-3	27
14	96	77	4	183	306	183	306	0	0
14	87	78	4	237	222	162	168	-75	-54
14	74	79	4	99	291	144	297	45	6
14	94	80	4	348	219	360	213	12	-6
14	85	81	4	198	168	216	162	18	-6
14	78	82	4	45	42	51	30	6	-12
14	93	83	4	315	213	303	213	-12	0
14	88	84	4	303	45	297	171	-6	126
14	77	85	4	93	108	171	90	78	-18
14	86	86	4	219	360	141	282	-78	-78
14	79	87	4	171	246	180	246	9	0
14	82	88	4	108	348	54	357	-54	9
14	73	89	4	279	102	264	108	-15	6
14	75	90	4	39	174	357	168	-42	-6
14	76	91	4	177	114	180	102	3	-12
14	90	92	4	246	279	222	288	-24	9
14	92	93	4	30	144	39	267	9	123
14	83	94	4	354	192	15	315	21	123
14	89	95	4	87	60	99	45	12	-15
14	95	96	4	291	297	288	291	-3	-6
14	111	97	5	51	18	66	24	15	6
14	98	98	5	255	15	258	3	3	-12
14	101	99	5	252	255	234	255	-18	0
14	97	100	5	204	324	252	306	48	-18
14	104	101	5	153	105	171	114	18	9
14	99	102	5	9	357	3	9	-6	12
14	106	103	5	327	228	360	216	33	-12
14	116	104	5	195	267	195	273	0	6
14	109	105	5	267	45	267	39	0	-6
14	105	106	5	201	72	204	63	3	-9
14	112	107	5	276	156	219	162	-57	6
14	113	108	5	150	333	165	342	15	9
14	117	109	5	288	264	285	261	-3	-3
14	110	110	5	117	81	117	96	0	15
14	102	111	5	69	192	66	183	-3	-9
14	115	112	5	342	165	354	165	12	0
14	108	113	5	42	303	54	303	12	0
14	107	114	5	51	24	60	6	9	-18
14	103	115	5	6	105	3	102	-3	-3
14	114	116	5	60	195	42	195	-18	0
14	118	117	5	36	162	42	282	6	120
14	120	118	5	135	21	159	18	24	-3
14	100	119	5	285	321	306	312	21	-9
14	119	120	5	231	141	246	129	15	-12
14	126	121	6	126	282	138	297	12	15
14	142	122	6	282	243	258	237	-24	-6
14	123	123	6	354	156	333	156	-21	0
14	128	124	6	99	87	159	27	60	-60
14	132	125	6	279	186	249	192	-30	6
14	131	126	6	39	252	63	246	24	-6
14	124	127	6	9	147	30	153	21	6
14	137	128	6	90	3	129	12	39	9
14	121	129	6	156	138	171	141	15	3
14	129	130	6	99	21	51	354	-48	-27
14	141	131	6	294	204	309	291	15	87
14	143	132	6	126	93	141	117	15	24
14	139	133	6	207	261	270	264	63	3
14	127	134	6	327	309	306	306	-21	-3
14	133	135	6	348	12	21	9	33	-3
14	135	136	6	162	132	138	120	-24	-12
14	122	137	6	336	297	348	297	12	0
14	136	138	6	339	81	6	81	27	0
14	140	139	6	213	270	270	285	57	15
14	134	140	6	36	201	51	201	15	0
14	138	141	6	78	93	105	105	27	12
14	144	142	6	24	243	357	225	-27	-18
14	130	143	6	237	141	267	153	30	12
14	125	144	6	183	30	132	33	-51	3
15	13	1	1	267	300	222	309	-45	9
15	16	2	1	147	153	12	93	-135	-60
15	6	3	1	261	12	234	6	-27	-6
15	2	4	1	147	66	111	51	-36	-15
15	3	5	1	69	309	168	312	99	3
15	12	6	1	237	111	258	141	21	30
15	5	7	1	321	243	9	357	48	114
15	18	8	1	87	348	246	123	159	135
15	1	9	1	168	225	138	255	-30	30
15	10	10	1	150	174	234	153	84	-21
15	15	11	1	351	213	168	147	177	-66
15	23	12	1	354	3	354	357	0	-6
15	22	13	1	186	135	285	267	99	132
15	8	14	1	6	312	54	270	48	-42
15	21	15	1	141	24	15	45	-126	21
15	17	16	1	300	234	234	234	-66	0
15	20	17	1	96	306	102	267	6	-39
15	11	18	1	297	90	282	123	-15	33
15	9	19	1	285	18	276	165	-9	147
15	7	20	1	300	318	288	135	-12	177
15	14	21	1	240	231	276	276	36	45
15	4	22	1	231	159	249	36	18	-123
15	24	23	1	54	21	6	39	-48	18
15	19	24	1	204	81	216	285	12	-156
15	29	25	2	30	3	357	360	-33	-3
15	45	26	2	129	132	219	111	90	-21
15	35	27	2	354	228	345	246	-9	18
15	27	28	2	18	264	3	252	-15	-12
15	38	29	2	282	87	231	114	-51	27
15	44	30	2	51	27	87	198	36	171
15	34	31	2	75	177	78	213	3	36
15	30	32	2	39	258	9	276	-30	18
15	25	33	2	39	93	3	54	-36	-39
15	28	34	2	327	360	36	156	69	156
15	39	35	2	105	165	144	162	39	-3
15	36	36	2	111	141	120	156	9	15
15	31	37	2	108	171	264	78	156	-93
15	41	38	2	141	126	75	162	-66	36
15	37	39	2	333	321	321	312	-12	-9
15	48	40	2	234	57	243	255	9	-162
15	32	41	2	105	357	84	15	-21	18
15	40	42	2	342	339	54	357	72	18
15	43	43	2	165	210	114	198	-51	-12
15	42	44	2	279	90	222	99	-57	9
15	46	45	2	207	216	156	342	-51	126
15	33	46	2	249	246	255	321	6	75
15	47	47	2	186	279	264	270	78	-9
15	26	48	2	246	165	243	222	-3	57
15	67	49	3	294	273	273	273	-21	0
15	64	50	3	207	21	231	57	24	36
15	52	51	3	351	33	324	48	-27	15
15	66	52	3	348	333	342	312	-6	-21
15	51	53	3	279	42	231	45	-48	3
15	63	54	3	18	57	24	60	6	3
15	55	55	3	18	321	27	321	9	0
15	60	56	3	63	87	39	72	-24	-15
15	71	57	3	285	168	273	156	-12	-12
15	61	58	3	78	231	141	249	63	18
15	58	59	3	135	87	144	78	9	-9
15	65	60	3	51	252	12	282	-39	30
15	72	61	3	138	258	132	270	-6	12
15	56	62	3	180	120	243	153	63	33
15	68	63	3	360	321	12	315	12	-6
15	57	64	3	207	42	210	15	3	-27
15	62	65	3	156	123	102	123	-54	0
15	70	66	3	294	201	282	213	-12	12
15	59	67	3	228	240	228	252	0	12
15	50	68	3	72	204	84	213	12	9
15	54	69	3	99	42	144	51	45	9
15	49	70	3	249	318	57	318	168	0
15	69	71	3	156	114	114	315	-42	-159
15	53	72	3	198	153	216	147	18	-6
15	89	73	4	114	147	144	339	30	-168
15	80	74	4	246	30	132	306	-114	-84
15	96	75	4	225	135	240	126	15	-9
15	78	76	4	210	336	243	354	33	18
15	87	77	4	249	318	258	342	9	24
15	91	78	4	204	306	243	309	39	3
15	73	79	4	84	144	351	294	-93	150
15	83	80	4	195	231	246	129	51	-102
15	75	81	4	6	189	12	177	6	-12
15	79	82	4	300	81	306	54	6	-27
15	81	83	4	210	192	258	213	48	21
15	86	84	4	60	45	87	99	27	54
15	90	85	4	300	39	273	33	-27	-6
15	94	86	4	96	297	120	318	24	21
15	77	87	4	141	237	144	327	3	90
15	85	88	4	297	24	63	315	126	-69
15	95	89	4	324	357	15	3	51	6
15	92	90	4	288	42	309	15	21	-27
15	74	91	4	9	108	6	345	-3	-123
15	76	92	4	126	174	96	27	-30	-147
15	88	93	4	84	342	123	348	39	6
15	93	94	4	270	111	231	150	-39	39
15	84	95	4	54	168	60	141	6	-27
15	82	96	4	348	216	18	210	30	-6
15	112	97	5	90	174	117	192	27	18
15	106	98	5	54	204	219	222	165	18
15	97	99	5	18	312	27	312	9	0
15	109	100	5	45	165	3	171	-42	6
15	107	101	5	270	288	258	306	-12	18
15	101	102	5	3	258	6	264	3	6
15	119	103	5	159	306	261	294	102	-12
15	114	104	5	48	330	6	18	-42	48
15	104	105	5	132	336	117	345	-15	9
15	105	106	5	264	351	198	309	-66	-42
15	116	107	5	102	78	120	66	18	-12
15	102	108	5	318	114	306	147	-12	33
15	113	109	5	153	21	192	3	39	-18
15	117	110	5	45	261	3	312	-42	51
15	120	111	5	195	36	231	264	36	-132
15	108	112	5	231	234	261	183	30	-51
15	99	113	5	102	153	315	213	-147	60
15	98	114	5	171	273	132	279	-39	6
15	110	115	5	255	222	222	297	-33	75
15	103	116	5	120	117	132	258	12	141
15	100	117	5	276	42	264	357	-12	-45
15	111	118	5	330	156	342	171	12	15
15	115	119	5	213	168	39	237	-174	69
15	118	120	5	312	90	294	63	-18	-27
16	3	1	1	192	339	201	69	9	90
16	23	2	1	240	81	246	99	6	18
16	16	3	1	42	225	27	213	-15	-12
16	22	4	1	141	267	96	177	-45	-90
16	10	5	1	66	66	69	48	3	-18
16	8	6	1	12	222	63	168	51	-54
16	20	7	1	327	201	348	204	21	3
16	1	8	1	231	339	261	114	30	135
16	12	9	1	105	162	39	162	-66	0
16	11	10	1	189	198	186	159	-3	-39
16	9	11	1	324	78	198	261	-126	-177
16	19	12	1	78	54	66	177	-12	123
16	5	13	1	312	48	234	57	-78	9
16	24	14	1	309	99	174	117	-135	18
16	17	15	1	354	165	228	87	-126	-78
16	15	16	1	174	321	174	330	0	9
16	7	17	1	21	300	111	117	90	177
16	14	18	1	258	255	153	231	-105	-24
16	6	19	1	90	114	282	171	-168	57
16	13	20	1	243	165	252	126	9	-39
16	18	21	1	57	324	255	48	-162	84
16	21	22	1	138	18	105	15	-33	-3
16	2	23	1	231	318	240	342	9	24
16	4	24	1	285	240	156	162	-129	-78
16	32	25	2	201	321	198	336	-3	15
16	42	26	2	147	186	102	165	-45	-21
16	41	27	2	273	285	264	297	-9	12
16	31	28	2	45	93	312	327	-93	-126
16	38	29	2	117	6	126	345	9	-21
16	30	30	2	90	33	153	198	63	165
16	35	31	2	360	204	342	117	-18	-87
16	37	32	2	36	174	42	75	6	-99
16	46	33	2	78	126	69	129	-9	3
16	36	34	2	219	270	225	243	6	-27
16	48	35	2	132	6	144	9	12	3
16	26	36	2	174	36	189	3	15	-33
16	33	37	2	222	69	330	249	108	-180
16	39	38	2	45	231	108	63	63	-168
16	45	39	2	150	21	180	18	30	-3
16	29	40	2	330	120	342	102	12	-18
16	34	41	2	282	183	294	204	12	21
16	25	42	2	318	345	345	165	27	-180
16	47	43	2	117	183	102	183	-15	0
16	40	44	2	264	273	210	84	-54	171
16	28	45	2	324	120	318	66	-6	-54
16	43	46	2	321	81	48	63	87	-18
16	44	47	2	279	84	282	84	3	0
16	27	48	2	234	324	333	327	99	3
16	58	49	3	348	279	351	219	3	-60
16	72	50	3	171	261	189	243	18	-18
16	71	51	3	303	30	303	15	0	-15
16	67	52	3	69	174	66	180	-3	6
16	51	53	3	120	156	84	24	-36	-132
16	52	54	3	237	207	270	219	33	12
16	65	55	3	15	231	345	201	-30	-30
16	53	56	3	120	114	357	171	-123	57
16	50	57	3	96	75	90	63	-6	-12
16	69	58	3	15	219	102	168	87	-51
16	64	59	3	144	342	120	231	-24	-111
16	59	60	3	327	63	102	24	135	-39
16	70	61	3	279	138	246	138	-33	0
16	56	62	3	333	15	342	345	9	-30
16	62	63	3	216	297	261	294	45	-3
16	55	64	3	300	201	336	69	36	-132
16	60	65	3	135	123	120	114	-15	-9
16	54	66	3	54	132	78	114	24	-18
16	61	67	3	108	66	345	96	-123	30
16	63	68	3	180	324	186	327	6	3
16	68	69	3	267	186	201	345	-66	159
16	49	70	3	204	234	117	165	-87	-69
16	66	71	3	168	3	168	165	0	162
16	57	72	3	66	351	102	336	36	-15
16	93	73	4	120	306	96	204	-24	-102
16	73	74	4	126	120	192	105	66	-15
16	82	75	4	330	18	309	27	-21	9
16	91	76	4	309	351	303	138	-6	147
16	78	77	4	360	291	6	3	6	72
16	84	78	4	192	306	201	108	9	162
16	85	79	4	258	174	207	123	-51	-51
16	80	80	4	315	147	213	156	-102	9
16	86	81	4	339	222	24	231	45	9
16	96	82	4	75	87	249	255	174	168
16	83	83	4	201	132	195	69	-6	-63
16	74	84	4	177	360	198	18	21	18
16	79	85	4	204	54	84	12	-120	-42
16	92	86	4	90	111	63	285	-27	174
16	75	87	4	258	222	207	225	-51	3
16	89	88	4	51	96	21	72	-30	-24
16	90	89	4	249	210	159	168	-90	-42
16	94	90	4	21	162	9	12	-12	-150
16	87	91	4	264	327	243	270	-21	-57
16	95	92	4	177	144	291	312	114	168
16	77	93	4	87	255	135	342	48	87
16	81	94	4	270	294	252	312	-18	18
16	76	95	4	351	174	24	189	33	15
16	88	96	4	258	54	219	354	-39	-60
16	109	97	5	45	189	21	171	-24	-18
16	105	98	5	282	291	312	210	30	-81
16	101	99	5	273	309	315	264	42	-45
16	115	100	5	63	174	276	150	-147	-24
16	114	101	5	39	222	57	120	18	-102
16	110	102	5	276	102	270	117	-6	15
16	116	103	5	342	357	333	339	-9	-18
16	113	104	5	315	99	336	66	21	-33
16	103	105	5	111	279	141	15	30	96
16	99	106	5	336	24	348	12	12	-12
16	107	107	5	150	201	159	192	9	-9
16	106	108	5	150	249	99	126	-51	-123
16	100	109	5	114	282	165	306	51	24
16	97	110	5	267	342	231	297	-36	-45
16	120	111	5	228	99	273	315	45	-144
16	102	112	5	198	330	189	189	-9	-141
16	104	113	5	6	153	18	147	12	-6
16	119	114	5	360	333	15	324	15	-9
16	118	115	5	270	72	54	174	144	102
16	108	116	5	345	12	270	342	-75	-30
16	112	117	5	228	105	249	294	21	-171
16	98	118	5	222	162	249	225	27	63
16	111	119	5	114	117	354	75	-120	-42
16	117	120	5	63	198	69	195	6	-3
16	141	121	6	252	9	291	78	39	69
16	139	122	6	306	309	288	303	-18	-6
16	126	123	6	51	87	66	57	15	-30
16	140	124	6	342	81	3	48	21	-33
16	123	125	6	21	183	42	177	21	-6
16	134	126	6	294	156	282	186	-12	30
16	127	127	6	126	90	162	78	36	-12
16	136	128	6	354	306	336	75	-18	129
16	121	129	6	234	213	210	198	-24	-15
16	125	130	6	228	90	279	114	51	24
16	124	131	6	306	270	120	273	174	3
16	133	132	6	72	360	51	3	-21	3
16	122	133	6	12	66	339	51	-33	-15
16	138	134	6	162	330	120	333	-42	3
16	144	135	6	153	243	150	207	-3	-36
16	135	136	6	162	294	159	303	-3	9
16	142	137	6	348	42	339	42	-9	0
16	128	138	6	102	300	162	294	60	-6
16	129	139	6	282	222	24	237	102	15
16	131	140	6	78	147	165	165	87	18
16	130	141	6	246	258	258	264	12	6
16	132	142	6	72	78	75	81	3	3
16	137	143	6	15	342	231	225	-144	-117
16	143	144	6	219	174	237	135	18	-39
19	14	1	1	228	63	234	63	6	0
19	11	2	1	270	111	144	105	-126	-6
19	13	3	1	24	153	261	360	-123	-153
19	4	4	1	78	48	123	111	45	63
19	10	5	1	333	258	336	297	3	39
19	17	6	1	39	132	15	198	-24	66
19	24	7	1	138	201	63	321	-75	120
19	23	8	1	237	90	102	6	-135	-84
19	5	9	1	108	6	27	282	-81	-84
19	9	10	1	291	168	312	186	21	18
19	22	11	1	24	360	117	333	93	-27
19	21	12	1	162	303	132	273	-30	-30
19	2	13	1	129	117	249	252	120	135
19	8	14	1	54	186	69	153	15	-33
19	3	15	1	186	309	69	141	-117	-168
19	20	16	1	336	195	303	249	-33	54
19	1	17	1	309	138	294	165	-15	27
19	16	18	1	117	351	339	27	-138	36
19	12	19	1	6	81	102	222	96	141
19	7	20	1	117	297	141	276	24	-21
19	6	21	1	177	231	33	123	-144	-108
19	18	22	1	24	306	201	12	177	66
19	19	23	1	168	288	36	189	-132	-99
19	15	24	1	243	351	318	234	75	-117
19	45	25	2	9	243	219	321	-150	78
19	30	26	2	108	90	339	165	-129	75
19	44	27	2	318	3	357	351	39	-12
19	25	28	2	15	255	9	258	-6	3
19	43	29	2	189	255	114	69	-75	174
19	33	30	2	333	195	273	129	-60	-66
19	31	31	2	219	222	60	225	-159	3
19	35	32	2	207	141	249	117	42	-24
19	48	33	2	150	6	330	216	-180	-150
19	29	34	2	264	117	36	174	132	57
19	32	35	2	261	78	15	264	114	-174
19	40	36	2	258	219	276	237	18	18
19	41	37	2	114	12	114	132	0	120
19	26	38	2	243	315	330	324	87	9
19	42	39	2	54	18	63	3	9	-15
19	47	40	2	81	96	72	9	-9	-87
19	39	41	2	21	24	72	51	51	27
19	27	42	2	198	129	129	123	-69	-6
19	28	43	2	84	198	84	198	0	0
19	34	44	2	60	279	117	261	57	-18
19	38	45	2	147	231	30	81	-117	-150
19	46	46	2	330	285	336	18	6	93
19	37	47	2	282	309	315	255	33	-54
19	36	48	2	267	96	66	156	159	60
19	56	49	3	351	174	138	192	147	18
19	58	50	3	183	213	240	150	57	-63
19	54	51	3	132	117	132	123	0	6
19	68	52	3	96	60	75	234	-21	174
19	64	53	3	246	129	264	276	18	147
19	53	54	3	63	36	63	150	0	114
19	72	55	3	72	309	69	159	-3	-150
19	62	56	3	282	15	252	246	-30	-129
19	70	57	3	243	219	225	219	-18	0
19	69	58	3	231	78	102	153	-129	75
19	52	59	3	27	111	39	348	12	-123
19	66	60	3	84	174	273	249	-171	75
19	71	61	3	117	78	348	315	-129	-123
19	65	62	3	345	300	132	246	147	-54
19	63	63	3	306	264	60	123	114	-141
19	61	64	3	117	240	129	303	12	63
19	57	65	3	12	63	294	99	-78	36
19	50	66	3	318	351	156	342	-162	-9
19	60	67	3	24	60	21	21	-3	-39
19	67	68	3	168	12	285	66	117	54
19	51	69	3	153	360	150	93	-3	93
19	49	70	3	297	315	51	135	114	-180
19	59	71	3	270	174	33	327	123	153
19	55	72	3	66	153	87	315	21	162
19	92	73	4	252	165	357	12	105	-153
19	96	74	4	69	321	153	321	84	0
19	75	75	4	339	135	27	3	48	-132
19	91	76	4	234	237	117	300	-117	63
19	88	77	4	234	108	261	105	27	-3
19	85	78	4	261	267	270	282	9	15
19	89	79	4	6	120	120	183	114	63
[truncated: 1,937 more rows]
