# Supplementary material for: Cortico-hippocampal network connections support the multidimensional quality of episodic memory
Source: eLife. 2019 Mar 22;8:e45591. doi: 10.7554/eLife.45591 (PMC6450667; doi:10.7554/eLife.45591)
Supplement: Figure 2—source data 2. [file elife-45591-fig2-data2.xlsx]

## Sheet: Dependency
SubID	ColorS-SceneS Corrected Dependency	EmotionS-ColorS Corrected Dependency	EmotionS-SceneS Corrected Dependency	ColorP-SceneP Z	ColorS-SceneP Z	SceneS-ColorP Z
1	0.121817	0.051794	0.111208	-0.117099	-0.0189169	0.018461
2	0.0893133	0.0582562	0.0599923	0.0771486	0.0831349	-0.142389
3	0.0399306	0.0108989	0.0434028	-0.105469	0.0198893	0.188171
4	0.00115741	-0.00231481	0.0123457	0.00625843	-0.0628194	0.0805319
5	0.0445833	0.0641667	0.119167	-0.000950027	-0.0314781	-0.0435518
6	0.0277778	-0.00665509	0.0601852	-0.124788	-0.0375617	-0.107574
7	0.113812	0.00636574	0.052662	-0.162043	0.0590614	0.181893
9	0.0801389	0.0722222	0.0111111	0.14183	-0.0316337	-0.0787504
10	0.0405093	0.0104167	0.0228588	0.120056	0.169516	0.0964383
11	0.0185185	0.00462963	0.0555556	0.189275	-0.0828788	-0.161395
13	0.207361	0.134722	0.126389	0.0484313	-0.180624	0.0655282
14	0.0601852	0.0405093	0.0814043	0.0843766	0.0287836	0.134952
15	0.0701389	0.0861111	-0.0161111	-0.0994913	-0.00843198	0.0232844
16	0.0664545	0.0374228	0.0489969	0.0352308	0.105426	0.156989
19	0.125675	0.0813079	0.1114	0.33871	0.111209	-0.0599363
20	0.0243056	0.0428241	0.0651042	-0.0910305	0.0910173	-0.121197
21	0.00115741	0.0150463	0.0461998	-0.0267826	0.257781	0.106281
22	0.087963	0.0771605	0.0601852	0.0295443	0.239219	0.162895
24	0.0268133	0.0661651	0.0311535	0.00826296	-0.0772825	0.00558029
25	0.153935	0.0745563	0.0636574	0.0148232	0.0201606	0.138783
27	0.163773	0.0743634	0.118248	-0.19694	-0.186274	-0.141408
28	0.14728	0.0127315	0.0250772	-0.0828765	0.1051	0.37265
29	0.113137	0.0810185	0.14892	0.0280097	0.232534	0.12522
30	0.0758102	0.046875	0.0784144	-0.111202	-0.0416876	0.0358259
31	0.056713	0.0078125	0.03125	0.0429996	0.0167689	0.00322922
32	0.0864198	0.054591	0.114198	0.0222322	0.0467683	0.033269
33	0.0909529	0.0448495	0.0471644	0.0762516	0.0963179	-0.0190248
34	0.0425347	0.0581597	0.108507	0.0499452	0.200477	-0.0137244
