# Supplementary material for: Cortico-hippocampal network connections support the multidimensional quality of episodic memory
Source: eLife. 2019 Mar 22;8:e45591. doi: 10.7554/eLife.45591 (PMC6450667; doi:10.7554/eLife.45591)
Supplement: Figure 3—source data 1. [file elife-45591-fig3-data1.xlsx]

## Sheet: Modularity
Subject	Task	Modularity
sub-s001	Encoding	0.0821465
sub-s001	Retrieval	0.00627729
sub-s002	Encoding	0.0358551
sub-s002	Retrieval	0.00866739
sub-s003	Encoding	0.0812543
sub-s003	Retrieval	0.0304397
sub-s004	Encoding	0.127333
sub-s004	Retrieval	0.0446982
sub-s005	Encoding	0.491347
sub-s005	Retrieval	0.12233
sub-s006	Encoding	0.212359
sub-s006	Retrieval	0.119635
sub-s007	Encoding	0.209065
sub-s007	Retrieval	0.0620986
sub-s009	Encoding	0.187496
sub-s009	Retrieval	0.195035
sub-s010	Encoding	0.0549209
sub-s010	Retrieval	-6.88638e-17
sub-s011	Encoding	0.0681375
sub-s011	Retrieval	0.00430242
sub-s013	Encoding	0.291912
sub-s013	Retrieval	0.0731539
sub-s014	Encoding	0.245184
sub-s014	Retrieval	0.129312
sub-s015	Encoding	0.114287
sub-s015	Retrieval	0.0324282
sub-s016	Encoding	0.21726
sub-s016	Retrieval	0.220059
sub-s019	Encoding	0.0514278
sub-s019	Retrieval	0.0768782
sub-s020	Encoding	0.0418622
sub-s020	Retrieval	-1.2187e-17
sub-s021	Encoding	0.115042
sub-s021	Retrieval	0.0598553
sub-s022	Encoding	0.172735
sub-s022	Retrieval	0.19513
sub-s024	Encoding	-5.64295e-17
sub-s024	Retrieval	4.89472e-17
sub-s025	Encoding	0.109403
sub-s025	Retrieval	0.149747
sub-s027	Encoding	0.00644176
sub-s027	Retrieval	-8.04673e-17
sub-s028	Encoding	0.343172
sub-s028	Retrieval	0.388
sub-s029	Encoding	0.0182045
sub-s029	Retrieval	-2.73479e-18
sub-s030	Encoding	0.0568212
sub-s030	Retrieval	0.00511923
sub-s031	Encoding	0.238725
sub-s031	Retrieval	0.00739885
sub-s032	Encoding	0.0880243
sub-s032	Retrieval	-8.8357e-17
sub-s033	Encoding	0.0464442
sub-s033	Retrieval	-3.71212e-17
sub-s034	Encoding	0.0903883
sub-s034	Retrieval	0.200743

## Sheet: Density
Subject	Task	Measure	Strength
sub-s001	Encoding	Within	0.555514
sub-s001	Encoding	Between	0.381703
sub-s001	Retrieval	Within	0.509029
sub-s001	Retrieval	Between	0.436877
sub-s002	Encoding	Within	0.425742
sub-s002	Encoding	Between	0.393748
sub-s002	Retrieval	Within	0.428787
sub-s002	Retrieval	Between	0.382706
sub-s003	Encoding	Within	0.387452
sub-s003	Encoding	Between	0.308083
sub-s003	Retrieval	Within	0.493053
sub-s003	Retrieval	Between	0.402099
sub-s004	Encoding	Within	0.301167
sub-s004	Encoding	Between	0.207651
sub-s004	Retrieval	Within	0.42569
sub-s004	Retrieval	Between	0.361743
sub-s005	Encoding	Within	0.213358
sub-s005	Encoding	Between	0.0364493
sub-s005	Retrieval	Within	0.300799
sub-s005	Retrieval	Between	0.155425
sub-s006	Encoding	Within	0.334813
sub-s006	Encoding	Between	0.142707
sub-s006	Retrieval	Within	0.435415
sub-s006	Retrieval	Between	0.264637
sub-s007	Encoding	Within	0.30046
sub-s007	Encoding	Between	0.20681
sub-s007	Retrieval	Within	0.377313
sub-s007	Retrieval	Between	0.318047
sub-s009	Encoding	Within	0.466574
sub-s009	Encoding	Between	0.216064
sub-s009	Retrieval	Within	0.347251
sub-s009	Retrieval	Between	0.154832
sub-s010	Encoding	Within	0.46413
sub-s010	Encoding	Between	0.347931
sub-s010	Retrieval	Within	0.574471
sub-s010	Retrieval	Between	0.506666
sub-s011	Encoding	Within	0.505209
sub-s011	Encoding	Between	0.374861
sub-s011	Retrieval	Within	0.575312
sub-s011	Retrieval	Between	0.515749
sub-s013	Encoding	Within	0.261147
sub-s013	Encoding	Between	0.140888
sub-s013	Retrieval	Within	0.301157
sub-s013	Retrieval	Between	0.279013
sub-s014	Encoding	Within	0.328986
sub-s014	Encoding	Between	0.157213
sub-s014	Retrieval	Within	0.344927
sub-s014	Retrieval	Between	0.202369
sub-s015	Encoding	Within	0.416096
sub-s015	Encoding	Between	0.271145
sub-s015	Retrieval	Within	0.437783
sub-s015	Retrieval	Between	0.342002
sub-s016	Encoding	Within	0.290709
sub-s016	Encoding	Between	0.115805
sub-s016	Retrieval	Within	0.279959
sub-s016	Retrieval	Between	0.118092
sub-s019	Encoding	Within	0.436191
sub-s019	Encoding	Between	0.356192
sub-s019	Retrieval	Within	0.366523
sub-s019	Retrieval	Between	0.294275
sub-s020	Encoding	Within	0.466576
sub-s020	Encoding	Between	0.425452
sub-s020	Retrieval	Within	0.632127
sub-s020	Retrieval	Between	0.615997
sub-s021	Encoding	Within	0.320342
sub-s021	Encoding	Between	0.202932
sub-s021	Retrieval	Within	0.398752
sub-s021	Retrieval	Between	0.323512
sub-s022	Encoding	Within	0.370626
sub-s022	Encoding	Between	0.236596
sub-s022	Retrieval	Within	0.319613
sub-s022	Retrieval	Between	0.21234
sub-s024	Encoding	Within	0.627275
sub-s024	Encoding	Between	0.570764
sub-s024	Retrieval	Within	0.599728
sub-s024	Retrieval	Between	0.514
sub-s025	Encoding	Within	0.436298
sub-s025	Encoding	Between	0.272422
sub-s025	Retrieval	Within	0.397448
sub-s025	Retrieval	Between	0.200313
sub-s027	Encoding	Within	0.535003
sub-s027	Encoding	Between	0.473864
sub-s027	Retrieval	Within	0.635308
sub-s027	Retrieval	Between	0.592675
sub-s028	Encoding	Within	0.201014
sub-s028	Encoding	Between	0.0782477
sub-s028	Retrieval	Within	0.287392
sub-s028	Retrieval	Between	0.030306
sub-s029	Encoding	Within	0.564045
sub-s029	Encoding	Between	0.460459
sub-s029	Retrieval	Within	0.666864
sub-s029	Retrieval	Between	0.590937
sub-s030	Encoding	Within	0.433704
sub-s030	Encoding	Between	0.352215
sub-s030	Retrieval	Within	0.492375
sub-s030	Retrieval	Between	0.462003
sub-s031	Encoding	Within	0.227868
sub-s031	Encoding	Between	0.0644486
sub-s031	Retrieval	Within	0.4232
sub-s031	Retrieval	Between	0.375781
sub-s032	Encoding	Within	0.437077
sub-s032	Encoding	Between	0.318853
sub-s032	Retrieval	Within	0.537227
sub-s032	Retrieval	Between	0.489244
sub-s033	Encoding	Within	0.463757
sub-s033	Encoding	Between	0.34862
sub-s033	Retrieval	Within	0.603295
sub-s033	Retrieval	Between	0.549243
sub-s034	Encoding	Within	0.334824
sub-s034	Encoding	Between	0.215959
sub-s034	Retrieval	Within	0.238095
sub-s034	Retrieval	Between	0.178224
