# Supplementary material for: Cortico-hippocampal network connections support the multidimensional quality of episodic memory
Source: eLife. 2019 Mar 22;8:e45591. doi: 10.7554/eLife.45591 (PMC6450667; doi:10.7554/eLife.45591)
Supplement: Figure 4—source data 1. [file elife-45591-fig4-data1.xlsx]

## Sheet: Hipp-Network_MemoryQuality
Subject	Network	Region	MeanConnectivity
sub-s001	PM	aHIPP	0.762423
sub-s001	AT	aHIPP	-0.905764
sub-s001	PM	pHIPP	-0.218881
sub-s001	AT	pHIPP	-0.203668
sub-s002	PM	aHIPP	0.708668
sub-s002	AT	aHIPP	-0.0694443
sub-s002	PM	pHIPP	1.49524
sub-s002	AT	pHIPP	1.48121
sub-s003	PM	aHIPP	1.0496
sub-s003	AT	aHIPP	0.7201
sub-s003	PM	pHIPP	1.60714
sub-s003	AT	pHIPP	1.18208
sub-s004	PM	aHIPP	0.348743
sub-s004	AT	aHIPP	0.843088
sub-s004	PM	pHIPP	1.48709
sub-s004	AT	pHIPP	1.16748
sub-s005	PM	aHIPP	0.875079
sub-s005	AT	aHIPP	0.667409
sub-s005	PM	pHIPP	2.20234
sub-s005	AT	pHIPP	1.1052
sub-s006	PM	aHIPP	0.432378
sub-s006	AT	aHIPP	0.00977537
sub-s006	PM	pHIPP	-0.578635
sub-s006	AT	pHIPP	0.331795
sub-s007	PM	aHIPP	-0.275762
sub-s007	AT	aHIPP	-0.363339
sub-s007	PM	pHIPP	-0.124094
sub-s007	AT	pHIPP	-0.286019
sub-s009	PM	aHIPP	0.37002
sub-s009	AT	aHIPP	-0.70532
sub-s009	PM	pHIPP	-0.46738
sub-s009	AT	pHIPP	-0.967806
sub-s010	PM	aHIPP	0.451458
sub-s010	AT	aHIPP	0.0531281
sub-s010	PM	pHIPP	1.83272
sub-s010	AT	pHIPP	1.09795
sub-s011	PM	aHIPP	0.355602
sub-s011	AT	aHIPP	0.559275
sub-s011	PM	pHIPP	1.14114
sub-s011	AT	pHIPP	1.49643
sub-s013	PM	aHIPP	1.85633
sub-s013	AT	aHIPP	0.969641
sub-s013	PM	pHIPP	1.09362
sub-s013	AT	pHIPP	0.543193
sub-s014	PM	aHIPP	0.324532
sub-s014	AT	aHIPP	2.00664
sub-s014	PM	pHIPP	0.761277
sub-s014	AT	pHIPP	1.58084
sub-s015	PM	aHIPP	-0.92624
sub-s015	AT	aHIPP	1.03037
sub-s015	PM	pHIPP	-1.29261
sub-s015	AT	pHIPP	-0.218363
sub-s016	PM	aHIPP	0.376986
sub-s016	AT	aHIPP	-0.208167
sub-s016	PM	pHIPP	0.710519
sub-s016	AT	pHIPP	0.0441509
sub-s019	PM	aHIPP	-0.830345
sub-s019	AT	aHIPP	-0.764235
sub-s019	PM	pHIPP	-0.983464
sub-s019	AT	pHIPP	-0.559738
sub-s020	PM	aHIPP	2.45336
sub-s020	AT	aHIPP	2.4088
sub-s020	PM	pHIPP	1.8294
sub-s020	AT	pHIPP	2.62062
sub-s021	PM	aHIPP	1.15574
sub-s021	AT	aHIPP	0.979036
sub-s021	PM	pHIPP	0.0837132
sub-s021	AT	pHIPP	-0.677176
sub-s022	PM	aHIPP	0.999856
sub-s022	AT	aHIPP	0.496195
sub-s022	PM	pHIPP	1.8874
sub-s022	AT	pHIPP	1.05591
sub-s024	PM	aHIPP	0.614171
sub-s024	AT	aHIPP	0.824856
sub-s024	PM	pHIPP	1.36389
sub-s024	AT	pHIPP	1.1037
sub-s025	PM	aHIPP	-0.706078
sub-s025	AT	aHIPP	-0.219424
sub-s025	PM	pHIPP	-0.362709
sub-s025	AT	pHIPP	0.588798
sub-s027	PM	aHIPP	0.33933
sub-s027	AT	aHIPP	-0.722618
sub-s027	PM	pHIPP	0.232901
sub-s027	AT	pHIPP	0.297651
sub-s028	PM	aHIPP	0.0881478
sub-s028	AT	aHIPP	0.720533
sub-s028	PM	pHIPP	0.56679
sub-s028	AT	pHIPP	0.0810648
sub-s029	PM	aHIPP	0.373729
sub-s029	AT	aHIPP	-0.140439
sub-s029	PM	pHIPP	0.472215
sub-s029	AT	pHIPP	-0.375258
sub-s030	PM	aHIPP	1.30911
sub-s030	AT	aHIPP	1.07978
sub-s030	PM	pHIPP	0.431711
sub-s030	AT	pHIPP	0.877237
sub-s031	PM	aHIPP	3.29798
sub-s031	AT	aHIPP	1.8873
sub-s031	PM	pHIPP	3.56075
sub-s031	AT	pHIPP	1.02837
sub-s032	PM	aHIPP	-1.77811
sub-s032	AT	aHIPP	-1.2276
sub-s032	PM	pHIPP	-0.183505
sub-s032	AT	pHIPP	-3.12924e-05
sub-s033	PM	aHIPP	-0.89793
sub-s033	AT	aHIPP	-1.18921
sub-s033	PM	pHIPP	-1.26615
sub-s033	AT	pHIPP	-1.80124
sub-s034	PM	aHIPP	0.427494
sub-s034	AT	aHIPP	-0.392163
sub-s034	PM	pHIPP	0.760613
sub-s034	AT	pHIPP	1.45882
