# Supplementary material for: Cortico-hippocampal network connections support the multidimensional quality of episodic memory
Source: eLife. 2019 Mar 22;8:e45591. doi: 10.7554/eLife.45591 (PMC6450667; doi:10.7554/eLife.45591)
Supplement: Figure 4—source data 2. [file elife-45591-fig4-data2.xlsx]

## Sheet: Univariate_MemoryQuality_data
SubID	ROI	MeanBeta
sub-s001	ANG	0.657569
sub-s002	ANG	-0.203348
sub-s003	ANG	-2.35116
sub-s004	ANG	1.37436
sub-s005	ANG	1.70387
sub-s006	ANG	4.40928
sub-s007	ANG	2.49414
sub-s009	ANG	3.18127
sub-s010	ANG	1.73107
sub-s011	ANG	0.175868
sub-s013	ANG	3.30493
sub-s014	ANG	0.235436
sub-s015	ANG	0.618259
sub-s016	ANG	3.15808
sub-s019	ANG	1.64353
sub-s020	ANG	-1.97515
sub-s021	ANG	-0.717306
sub-s022	ANG	1.73775
sub-s024	ANG	-4.27788
sub-s025	ANG	-0.463535
sub-s027	ANG	4.0078
sub-s028	ANG	-0.715105
sub-s029	ANG	-3.31186
sub-s030	ANG	1.01443
sub-s031	ANG	-0.174915
sub-s032	ANG	-1.82415
sub-s033	ANG	3.13914
sub-s034	ANG	1.3917
sub-s001	PREC	0.107207
sub-s002	PREC	-0.693505
sub-s003	PREC	-0.287823
sub-s004	PREC	1.29376
sub-s005	PREC	3.2637
sub-s006	PREC	4.92663
sub-s007	PREC	1.7298
sub-s009	PREC	3.0279
sub-s010	PREC	2.88269
sub-s011	PREC	1.56351
sub-s013	PREC	3.06828
sub-s014	PREC	0.976416
sub-s015	PREC	2.43343
sub-s016	PREC	3.32546
sub-s019	PREC	0.847469
sub-s020	PREC	-0.797637
sub-s021	PREC	-0.500453
sub-s022	PREC	2.23831
sub-s024	PREC	1.50983
sub-s025	PREC	1.2509
sub-s027	PREC	3.44508
sub-s028	PREC	0.612483
sub-s029	PREC	-0.507402
sub-s030	PREC	0.217736
sub-s031	PREC	1.16065
sub-s032	PREC	1.03905
sub-s033	PREC	3.65584
sub-s034	PREC	1.03865
sub-s001	PCC	0.545553
sub-s002	PCC	0.645875
sub-s003	PCC	-1.52487
sub-s004	PCC	-0.155249
sub-s005	PCC	0.740387
sub-s006	PCC	2.19645
sub-s007	PCC	0.636469
sub-s009	PCC	1.51443
sub-s010	PCC	2.37701
sub-s011	PCC	1.185
sub-s013	PCC	1.53908
sub-s014	PCC	0.600041
sub-s015	PCC	1.04107
sub-s016	PCC	2.33766
sub-s019	PCC	0.910057
sub-s020	PCC	-1.48966
sub-s021	PCC	-0.550945
sub-s022	PCC	1.26286
sub-s024	PCC	-0.995564
sub-s025	PCC	0.856373
sub-s027	PCC	2.51255
sub-s028	PCC	-0.244215
sub-s029	PCC	-1.25195
sub-s030	PCC	-1.14694
sub-s031	PCC	-0.116782
sub-s032	PCC	0.402391
sub-s033	PCC	1.76132
sub-s034	PCC	0.467445
sub-s001	RSC	0.663066
sub-s002	RSC	0.146921
sub-s003	RSC	-0.124115
sub-s004	RSC	1.30234
sub-s005	RSC	3.63025
sub-s006	RSC	4.76503
sub-s007	RSC	1.02165
sub-s009	RSC	3.31505
sub-s010	RSC	2.23127
sub-s011	RSC	4.30662
sub-s013	RSC	2.98768
sub-s014	RSC	1.25606
sub-s015	RSC	2.44919
sub-s016	RSC	3.69614
sub-s019	RSC	2.68116
sub-s020	RSC	-1.30451
sub-s021	RSC	-0.694382
sub-s022	RSC	2.65951
sub-s024	RSC	1.88059
sub-s025	RSC	2.96698
sub-s027	RSC	3.71119
sub-s028	RSC	-0.00739647
sub-s029	RSC	0.122487
sub-s030	RSC	-1.11994
sub-s031	RSC	-0.436155
sub-s032	RSC	0.503355
sub-s033	RSC	3.52807
sub-s034	RSC	1.10422
sub-s001	PHC	0.390653
sub-s002	PHC	-0.761269
sub-s003	PHC	1.47732
sub-s004	PHC	0.254478
sub-s005	PHC	1.74198
sub-s006	PHC	1.66348
sub-s007	PHC	0.587016
sub-s009	PHC	2.0532
sub-s010	PHC	0.762515
sub-s011	PHC	0.587769
sub-s013	PHC	3.37214
sub-s014	PHC	0.820058
sub-s015	PHC	0.839269
sub-s016	PHC	1.46489
sub-s019	PHC	-0.137508
sub-s020	PHC	-0.175861
sub-s021	PHC	-0.014936
sub-s022	PHC	3.59184
sub-s024	PHC	0.617487
sub-s025	PHC	0.53485
sub-s027	PHC	2.81211
sub-s028	PHC	1.55043
sub-s029	PHC	-0.623199
sub-s030	PHC	0.188568
sub-s031	PHC	1.60241
sub-s032	PHC	0.274745
sub-s033	PHC	3.17581
sub-s034	PHC	0.974591
sub-s001	pHIPP	0.0885695
sub-s002	pHIPP	0.485524
sub-s003	pHIPP	-0.464321
sub-s004	pHIPP	0.668844
sub-s005	pHIPP	1.19161
sub-s006	pHIPP	0.86793
sub-s007	pHIPP	0.755089
sub-s009	pHIPP	0.950743
sub-s010	pHIPP	2.24602
sub-s011	pHIPP	1.59117
sub-s013	pHIPP	0.846396
sub-s014	pHIPP	0.655678
sub-s015	pHIPP	1.0396
sub-s016	pHIPP	2.29152
sub-s019	pHIPP	-0.873423
sub-s020	pHIPP	-0.336896
sub-s021	pHIPP	-0.435783
sub-s022	pHIPP	1.46505
sub-s024	pHIPP	0.120415
sub-s025	pHIPP	0.24038
sub-s027	pHIPP	2.03764
sub-s028	pHIPP	0.648043
sub-s029	pHIPP	-0.853844
sub-s030	pHIPP	-0.307814
sub-s031	pHIPP	-0.298224
sub-s032	pHIPP	-0.00455312
sub-s033	pHIPP	0.916813
sub-s034	pHIPP	-0.0952484
sub-s001	aHIPP	0.101495
sub-s002	aHIPP	0.482822
sub-s003	aHIPP	0.256425
sub-s004	aHIPP	0.426965
sub-s005	aHIPP	0.905187
sub-s006	aHIPP	0.894523
sub-s007	aHIPP	0.15392
sub-s009	aHIPP	0.280618
sub-s010	aHIPP	1.47038
sub-s011	aHIPP	-0.414954
sub-s013	aHIPP	0.851624
sub-s014	aHIPP	0.47361
sub-s015	aHIPP	1.01528
sub-s016	aHIPP	1.90664
sub-s019	aHIPP	-0.725506
sub-s020	aHIPP	-1.31793
sub-s021	aHIPP	0.26044
sub-s022	aHIPP	0.866534
sub-s024	aHIPP	0.20344
sub-s025	aHIPP	0.281288
sub-s027	aHIPP	1.78193
sub-s028	aHIPP	0.576533
sub-s029	aHIPP	-0.562406
sub-s030	aHIPP	-0.0816381
sub-s031	aHIPP	-0.322517
sub-s032	aHIPP	-0.373945
sub-s033	aHIPP	1.72684
sub-s034	aHIPP	0.43389
sub-s001	PRC	-0.33757
sub-s002	PRC	-0.169142
sub-s003	PRC	-0.312677
sub-s004	PRC	-0.368125
sub-s005	PRC	0.281183
sub-s006	PRC	1.0773
sub-s007	PRC	-1.02647
sub-s009	PRC	0.888911
sub-s010	PRC	0.0075753
sub-s011	PRC	-0.060583
sub-s013	PRC	0.356424
sub-s014	PRC	0.711505
sub-s015	PRC	0.642458
sub-s016	PRC	0.50071
sub-s019	PRC	-1.12166
sub-s020	PRC	-1.41589
sub-s021	PRC	-0.514055
sub-s022	PRC	1.36416
sub-s024	PRC	-0.322615
sub-s025	PRC	0.841595
sub-s027	PRC	2.85922
sub-s028	PRC	0.07792
sub-s029	PRC	-0.984361
sub-s030	PRC	-0.0646558
sub-s031	PRC	0.349914
sub-s032	PRC	-0.547667
sub-s033	PRC	1.71195
sub-s034	PRC	-0.00310775
sub-s001	AMYG	0.28674
sub-s002	AMYG	0.0909176
sub-s003	AMYG	-0.904941
sub-s004	AMYG	0.971862
sub-s005	AMYG	1.02455
sub-s006	AMYG	1.42946
sub-s007	AMYG	-0.597836
sub-s009	AMYG	-0.221417
sub-s010	AMYG	1.30692
sub-s011	AMYG	0.647614
sub-s013	AMYG	1.36375
sub-s014	AMYG	0.286764
sub-s015	AMYG	0.938855
sub-s016	AMYG	1.40415
sub-s019	AMYG	-1.64332
sub-s020	AMYG	-0.886232
sub-s021	AMYG	-0.152611
sub-s022	AMYG	1.24791
sub-s024	AMYG	-0.468827
sub-s025	AMYG	-0.0124393
sub-s027	AMYG	2.41586
sub-s028	AMYG	0.0667726
sub-s029	AMYG	-2.85523
sub-s030	AMYG	0.761084
sub-s031	AMYG	-0.112929
sub-s032	AMYG	-0.548484
sub-s033	AMYG	1.5696
sub-s034	AMYG	0.19876
sub-s001	FUS	-0.170066
sub-s002	FUS	-0.260472
sub-s003	FUS	0.403136
sub-s004	FUS	0.425513
sub-s005	FUS	0.40984
sub-s006	FUS	1.44922
sub-s007	FUS	-0.0690058
sub-s009	FUS	1.16756
sub-s010	FUS	0.267902
sub-s011	FUS	0.684099
sub-s013	FUS	0.838953
sub-s014	FUS	0.93745
sub-s015	FUS	0.946393
sub-s016	FUS	0.560171
sub-s019	FUS	-0.849968
sub-s020	FUS	-1.89389
sub-s021	FUS	-0.465192
sub-s022	FUS	0.830344
sub-s024	FUS	-0.492789
sub-s025	FUS	0.334084
sub-s027	FUS	2.29812
sub-s028	FUS	-0.144204
sub-s029	FUS	-2.09096
sub-s030	FUS	0.0172062
sub-s031	FUS	0.224973
sub-s032	FUS	0.192269
sub-s033	FUS	0.873577
sub-s034	FUS	0.52847
sub-s001	ITC	0.38835
sub-s002	ITC	-0.0294201
sub-s003	ITC	-0.956958
sub-s004	ITC	-0.666472
sub-s005	ITC	0.621376
sub-s006	ITC	1.42679
sub-s007	ITC	0.646066
sub-s009	ITC	1.03943
sub-s010	ITC	0.653176
sub-s011	ITC	1.08979
sub-s013	ITC	1.05595
sub-s014	ITC	0.25942
sub-s015	ITC	0.22693
sub-s016	ITC	1.03437
sub-s019	ITC	-0.665497
sub-s020	ITC	-1.34599
sub-s021	ITC	0.539673
sub-s022	ITC	1.11432
sub-s024	ITC	-0.429626
sub-s025	ITC	0.658389
sub-s027	ITC	2.05195
sub-s028	ITC	-0.774224
sub-s029	ITC	-2.09053
sub-s030	ITC	-1.01406
sub-s031	ITC	0.225902
sub-s032	ITC	-0.493092
sub-s033	ITC	0.930747
sub-s034	ITC	1.12616
sub-s001	OFC	0.720755
sub-s002	OFC	0.304141
sub-s003	OFC	-2.13614
sub-s004	OFC	0.0759664
sub-s005	OFC	0.0276645
sub-s006	OFC	1.28699
sub-s007	OFC	0.81193
sub-s009	OFC	2.00375
sub-s010	OFC	1.52575
sub-s011	OFC	0.9144
sub-s013	OFC	1.90338
sub-s014	OFC	0.321998
sub-s015	OFC	0.708042
sub-s016	OFC	2.3023
sub-s019	OFC	0.516952
sub-s020	OFC	-1.24237
sub-s021	OFC	0.0368323
sub-s022	OFC	1.77569
sub-s024	OFC	-0.885944
sub-s025	OFC	0.768778
sub-s027	OFC	2.59842
sub-s028	OFC	0.262064
sub-s029	OFC	-1.34954
sub-s030	OFC	-0.473947
sub-s031	OFC	0.213591
sub-s032	OFC	-0.160034
sub-s033	OFC	3.54505
sub-s034	OFC	0.673875
