# Supplementary material for: Cortico-hippocampal network connections support the multidimensional quality of episodic memory
Source: eLife. 2019 Mar 22;8:e45591. doi: 10.7554/eLife.45591 (PMC6450667; doi:10.7554/eLife.45591)
Supplement: Figure 5—source data 1. [file elife-45591-fig5-data1.xlsx]

## Sheet: Feature_Connections
SubID	Feature	SeedNetwork	Connectivity
sub-s001	Color	PM	-0.0632046
sub-s001	Color	AT	1.6678
sub-s001	Scene	PM	-0.0694275
sub-s001	Scene	AT	1.01834
sub-s002	Color	PM	0.347236
sub-s002	Color	AT	0.303328
sub-s002	Scene	PM	-0.0280145
sub-s002	Scene	AT	-0.0577417
sub-s003	Color	PM	0.700224
sub-s003	Color	AT	0.272237
sub-s003	Scene	PM	-0.399998
sub-s003	Scene	AT	-1.04165
sub-s004	Color	PM	0.000760498
sub-s004	Color	AT	0.290195
sub-s004	Scene	PM	0.0135025
sub-s004	Scene	AT	-0.899522
sub-s005	Color	PM	0.0931158
sub-s005	Color	AT	0.665764
sub-s005	Scene	PM	1.1519
sub-s005	Scene	AT	0.947961
sub-s006	Color	PM	-0.487515
sub-s006	Color	AT	0.417929
sub-s006	Scene	PM	0.0722827
sub-s006	Scene	AT	0.294485
sub-s007	Color	PM	0.201233
sub-s007	Color	AT	0.457699
sub-s007	Scene	PM	0.755223
sub-s007	Scene	AT	-0.498575
sub-s009	Color	PM	0.216444
sub-s009	Color	AT	-0.00985692
sub-s009	Scene	PM	0.451778
sub-s009	Scene	AT	0.266783
sub-s010	Color	PM	-0.562182
sub-s010	Color	AT	-0.249828
sub-s010	Scene	PM	0.184426
sub-s010	Scene	AT	-0.0443677
sub-s011	Color	PM	-0.901843
sub-s011	Color	AT	-0.127762
sub-s011	Scene	PM	0.333837
sub-s011	Scene	AT	2.31868
sub-s013	Color	PM	0.0704427
sub-s013	Color	AT	0.532241
sub-s013	Scene	PM	0.414996
sub-s013	Scene	AT	0.514219
sub-s014	Color	PM	-0.613596
sub-s014	Color	AT	0.0428408
sub-s014	Scene	PM	0.18811
sub-s014	Scene	AT	0.986631
sub-s015	Color	PM	-0.805386
sub-s015	Color	AT	-1.20504
sub-s015	Scene	PM	-0.632613
sub-s015	Scene	AT	-0.947841
sub-s016	Color	PM	0.180797
sub-s016	Color	AT	0.934429
sub-s016	Scene	PM	-0.371886
sub-s016	Scene	AT	-0.507404
sub-s019	Color	PM	0.371923
sub-s019	Color	AT	0.312003
sub-s019	Scene	PM	1.04356
sub-s019	Scene	AT	0.61112
sub-s020	Color	PM	1.27075
sub-s020	Color	AT	1.73071
sub-s020	Scene	PM	1.44559
sub-s020	Scene	AT	1.00571
sub-s021	Color	PM	-0.185426
sub-s021	Color	AT	0.444003
sub-s021	Scene	PM	0.238971
sub-s021	Scene	AT	0.828825
sub-s022	Color	PM	0.133463
sub-s022	Color	AT	-0.110994
sub-s022	Scene	PM	-0.326529
sub-s022	Scene	AT	0.43938
sub-s024	Color	PM	0.442391
sub-s024	Color	AT	0.515641
sub-s024	Scene	PM	1.66636
sub-s024	Scene	AT	2.4581
sub-s025	Color	PM	0.318591
sub-s025	Color	AT	0.196086
sub-s025	Scene	PM	0.606887
sub-s025	Scene	AT	0.268706
sub-s027	Color	PM	0.318983
sub-s027	Color	AT	1.70048
sub-s027	Scene	PM	0.552581
sub-s027	Scene	AT	0.291037
sub-s028	Color	PM	0.0527438
sub-s028	Color	AT	0.572623
sub-s028	Scene	PM	1.08683
sub-s028	Scene	AT	0.252894
sub-s029	Color	PM	0.588563
sub-s029	Color	AT	0.64885
sub-s029	Scene	PM	-0.0506143
sub-s029	Scene	AT	1.0305
sub-s030	Color	PM	0.774271
sub-s030	Color	AT	0.876047
sub-s030	Scene	PM	1.74998
sub-s030	Scene	AT	0.868939
sub-s031	Color	PM	0.311635
sub-s031	Color	AT	0.329052
sub-s031	Scene	PM	0.238644
sub-s031	Scene	AT	1.04323
sub-s032	Color	PM	-0.15299
sub-s032	Color	AT	-0.487577
sub-s032	Scene	PM	0.949782
sub-s032	Scene	AT	0.37369
sub-s033	Color	PM	0.376058
sub-s033	Color	AT	0.940206
sub-s033	Scene	PM	0.150441
sub-s033	Scene	AT	0.228244
sub-s034	Color	PM	0.599632
sub-s034	Color	AT	0.177363
sub-s034	Scene	PM	0.745597
sub-s034	Scene	AT	0.247692
