# Supplementary material for: Cortico-hippocampal network connections support the multidimensional quality of episodic memory
Source: eLife. 2019 Mar 22;8:e45591. doi: 10.7554/eLife.45591 (PMC6450667; doi:10.7554/eLife.45591)
Supplement: Table 1—source data 1. [file elife-45591-table1-data1.xlsx]

## Sheet: Success and Precision
SubID	ColorpT	ScenepT	Colork	Scenek	EmotionSuccess	EmotionConfidence
1	0.264351	0.511136	10.4477	10.0827	0.590278	0.576471
2	0.764735	0.551243	1.17787	4.98397	0.680556	0.72449
3	0.85001	0.872228	4.18387	24.1368	0.951389	0.868613
4	0.889071	0.85721	3.9572	17.3764	0.944444	0.941176
5	0.677542	0.509882	4.36868	24.5299	0.65	0.666667
6	0.435921	0.597215	5.27416	29.1741	0.798611	0.547826
7	0.422848	0.40236	4.65042	17.2895	0.645833	0.419355
9	0.482349	0.530139	3.68692	13.5968	0.666667	0.65
10	0.924334	0.888059	5.2763	29.4373	0.895833	0.953488
11	0.687027	0.494539	5.4382	11.1181	0.666667	0.520833
13	0.754509	0.63443	3.03549	33.2509	0.583333	0.685714
14	0.916489	0.831123	5.86948	38.5398	0.743056	0.859813
15	0.784848	0.649681	3.19734	7.50276	0.766667	0.826087
16	0.655548	0.487697	5.04744	10.5458	0.694444	0.8
19	0.284088	0.343923	13.7172	19.6878	0.645833	0.709677
20	0.535805	0.651996	3.43963	13.863	0.770833	0.720721
21	0.88808	0.837442	7.03408	15.4537	0.840278	0.702479
22	0.712229	0.609535	4.79127	25.4073	0.798611	0.417391
24	0.888059	0.888618	6.00156	81.7758	0.840278	0.61157
25	0.554794	0.468584	5.47364	42.62	0.659722	0.557895
27	0.625216	0.340925	5.58446	12.739	0.701389	0.792079
28	0.312352	0.549817	10.8634	27.1608	0.694444	0.81
29	0.478355	0.345198	5.58452	45.128	0.722222	0.519231
30	0.583645	0.819026	6.91311	47.4587	0.770833	1
31	0.843895	0.898252	4.05265	58.9614	0.9375	0.911111
32	0.885521	0.724204	3.01395	45.0163	0.881944	0.866142
33	0.893551	0.902391	4.26702	31.3467	0.854167	0.747967
34	0.822957	0.819472	4.77166	17.4205	0.770833	0.828829
